# Supplementary material for: Sex Steroid Hormone Analysis in Human Tear Fluid Using a Liquid Chromatography—Mass Spectrometry Method
Source: MDPI journal article supplement (doi:10.3390/ijms232314864), 2022-11-28

|   | Sample Name | Sample Type | Analyte Peak Name | Analyte Peak Area (counts) | Analyte Peak Height (cps) | Analyte Concentration (pmol/l) | Analyte Retention Time (min) | Analyte Signal To Noise | Area Ratio | IS Peak Name  | IS Peak Area (counts) | IS Peak Height (cps) | IS Retention Time (min) | Calculated Concentration (pmol/l) |
|---|-------------|-------------|-------------------|----------------------------|---------------------------|--------------------------------|------------------------------|-------------------------|------------|---------------|-----------------------|----------------------|-------------------------|-----------------------------------|
| 1 | St 0 pM     | Standard    | E1 145.0          | 8.24e+002                  | 4.78e+002                 | 0.00                           | 7.62                         | N/A                     | 0.00097    | E1-13C3 148.0 | 8.42e+005             | 2.95e+005            | 7.63                    | 0.0000000000                      |

Sample Name: St 0 pM File: 200420\_14500.msdc Run Date: 10/26/2020 Run Time: 10:00:00  
 Peak Name: E1 145.0 Masses: 246, 100.040, 686.000 Da  
 Comment: " Annotation:  
 Sample Type: Standard  
 Concentration: 0.00 pmol/l  
 Calculated Conc: 0.000000000000 pmol/l  
 Acq. Date: 4/27/2020  
 Acq. Time: 12:29:37 AM

Modified: Yes  
 Param. Algorithm: Split Parameters - HQ III  
 Minus Percentages: 50  
 Base Corr. Window: 1.00 min  
 Peak-Split. Factors: 8  
 Report Target Peaks: 8  
 Min. Peak Width: 0.00 cps  
 Min. Peak Width: 0.00 sec  
 Sample Type: Standard  
 PE Window: 30.0 sec points  
 Reported RT: 7.63 min  
 Use Relative RT: No

Int. Type: Manual  
 Retention Time: 7.62 min  
 Height: 4.78e+002 cps  
 Raw Time: 0.00 min  
 End Time: 7.64 min

Sample Name: St 0 pM File: 200420\_14500.msdc Run Date: 10/26/2020 Run Time: 10:00:00  
 Peak Name: E1-13C3 148.0 Masses: 272, 100.040, 686.000 Da  
 Comment: " Annotation:  
 Sample Type: Standard  
 Concentration: 1.00 pmol/l  
 Calculated Conc: 0.00 pmol/l  
 Acq. Date: 4/27/2020  
 Acq. Time: 12:29:37 AM

Modified: Yes  
 Param. Algorithm: Split Parameters - HQ III  
 Minus Percentages: 50  
 Base Corr. Window: 1.00 min  
 Peak-Split. Factors: 8  
 Report Target Peaks: 8  
 Min. Peak Width: 0.00 cps  
 Min. Peak Width: 0.00 sec  
 Sample Type: Standard  
 PE Window: 30.0 sec points  
 Reported RT: 7.63 min

7.62

7.63

7.62

7.63

|   | Sample Name | Sample Type | Analyte Peak Name | Analyte Peak Area (counts) | Analyte Peak Height (cps) | Analyte Concentration (pmol/l) | Analyte Retention Time (min) | Analyte Signal To Noise | Area Ratio | IS Peak Name  | IS Peak Area (counts) | IS Peak Height (cps) | IS Retention Time (min) | Calculated Concentration (pmol/l) |
|---|-------------|-------------|-------------------|----------------------------|---------------------------|--------------------------------|------------------------------|-------------------------|------------|---------------|-----------------------|----------------------|-------------------------|-----------------------------------|
| 1 | St 0 pM     | Standard    | E1 145.0          | 8.24e+002                  | 4.78e+002                 | 0.00                           | 7.62                         | N/A                     | 0.00097    | E1-13C3 148.0 | 8.42e+005             | 2.95e+005            | 7.63                    | 0.0000000000                      |

Sample Name: St 0 pM 13C3 148.0  
Peak Name: "E1 145.0"  
Concentration: 0.00 pmol/l  
Acq. Date: 4/27/2025  
Acq. Time: 12:29:37 AM

File: 200426\_13c3\_std\_mscw.mzml

Method: Acquisition

Sample Index: 21

Base: Sub. Window: 1.00 min

Report Largest Peaks: No

Min. Peak Width: 0.00 cps

Max. Peak Width: 0.00 sec

RT Window: 30.0 sec

Expected RT: 7.63 min

Size Relative RT: No

Int. Type: Manual

Detection Time: 7.62 min

Area: 8.24e+002 counts

Height: 4.78e+002 cps

Start Time: 7.62 min

End Time: 7.64 min

Sample Name: St 0 pM 13C3 148.0  
Peak Name: "E1-13C3 148.0"  
Concentration: 1.00 pmol/l  
Acq. Date: 4/27/2025  
Acq. Time: 12:29:37 AM

File: 200426\_13c3\_std\_mscw.mzml

Method: Acquisition

Sample Index: 21

Base: Sub. Window: 1.00 min

Report Largest Peaks: No

Min. Peak Width: 0.00 cps

Max. Peak Width: 0.00 sec

RT Window: 30.0 sec

Expected RT: 7.63 min

Size Relative RT: No

Int. Type: Manual

Detection Time: 7.63 min

Area: 8.42e+005 counts

Height: 2.95e+005 cps

Start Time: 7.63 min

End Time: 7.64 min

The figure displays two chromatograms side-by-side, comparing a standard sample (left) with a sample containing E1-13C3 (right). Both plots show intensity in counts per second (cps) on the y-axis against time in minutes on the x-axis. The left plot has a y-axis range from 0 to 3400 and an x-axis from 0.0 to 15.0. It features a prominent peak at 7.62 minutes with an area of 8.24e+002 counts and a height of 4.78e+002 cps. The right plot has a y-axis range from 0.0 to 2.9e5 and an x-axis from 0.0 to 15.0. It shows a corresponding peak at 7.63 minutes with an area of 8.42e+005 counts and a height of 2.95e+005 cps. A central inset provides a magnified view of the baseline and the two peaks, highlighting their retention times and relative intensities.

**Supplementary figure S1B: E2 chromatograms in blank samples.** Parent and transition ions E2 [M-H]<sup>-</sup> m/z 271.2 to m/z 271.2 and m/z 183.1 in 0 pmol/L standard sample and water blank sample. No internal standard was added to the water blank.

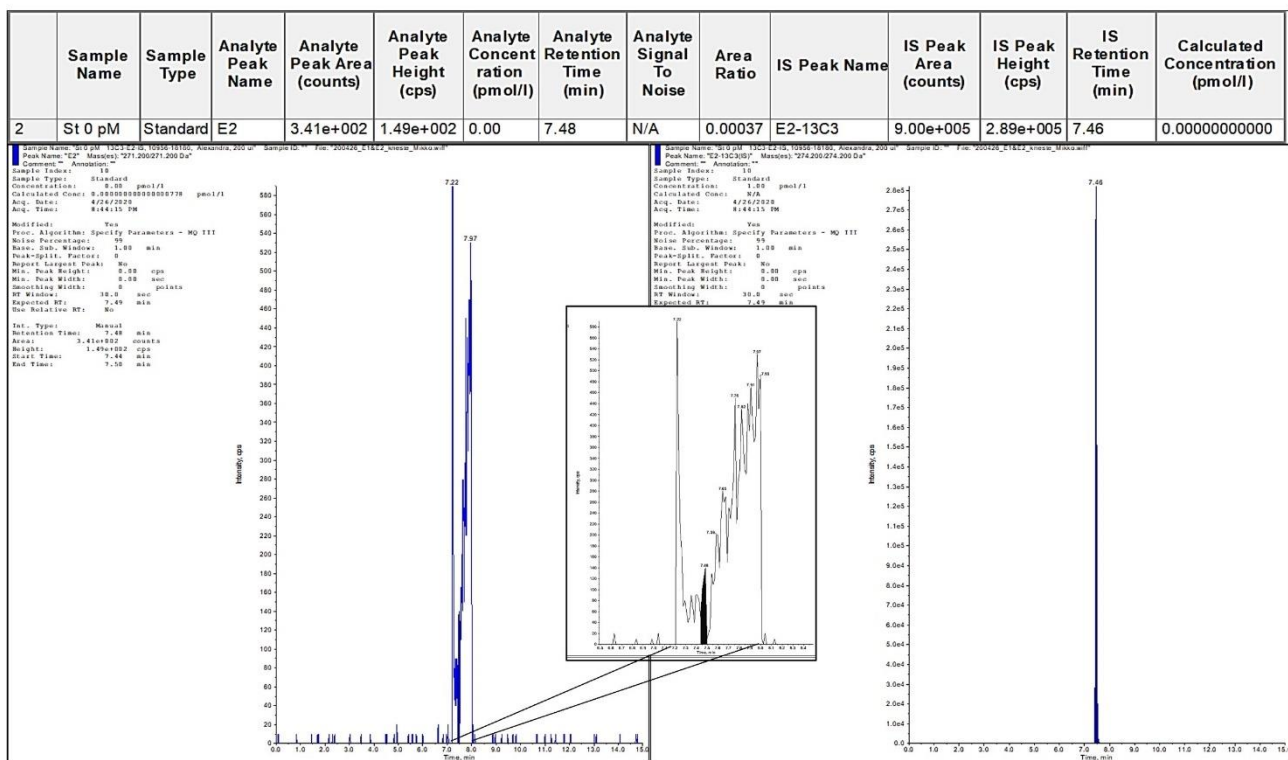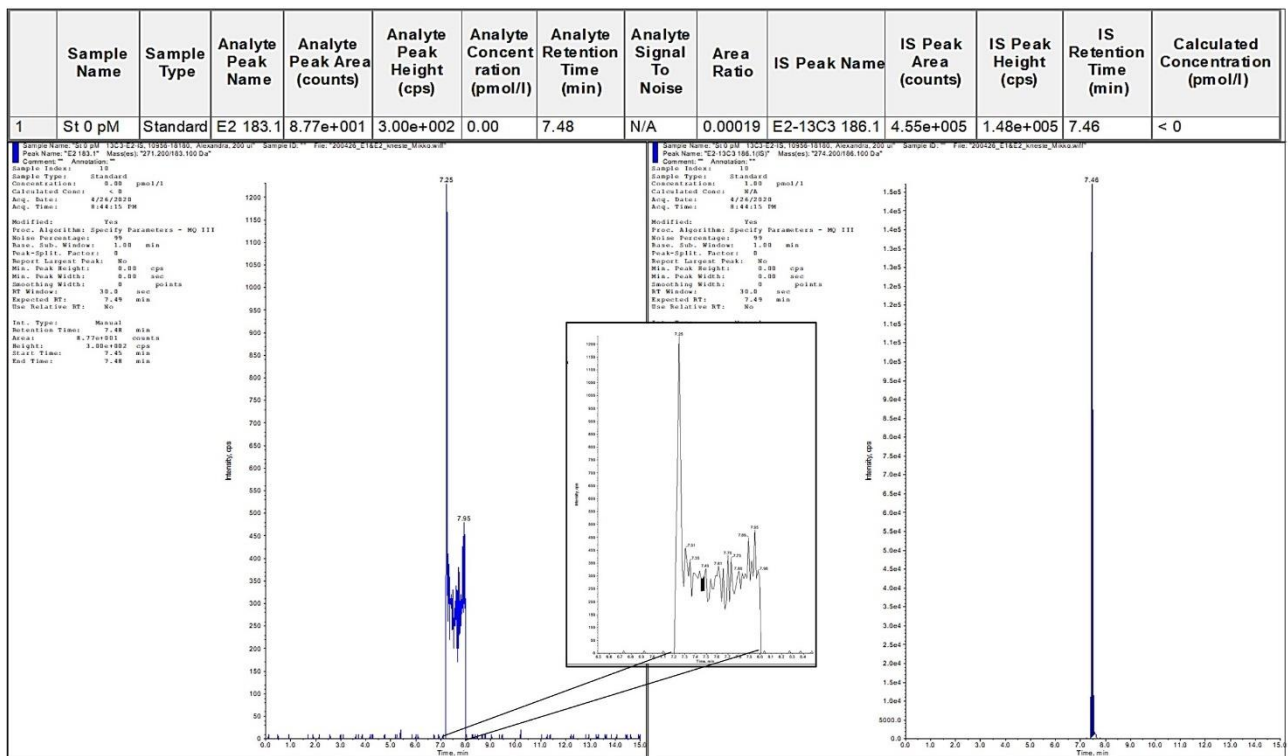

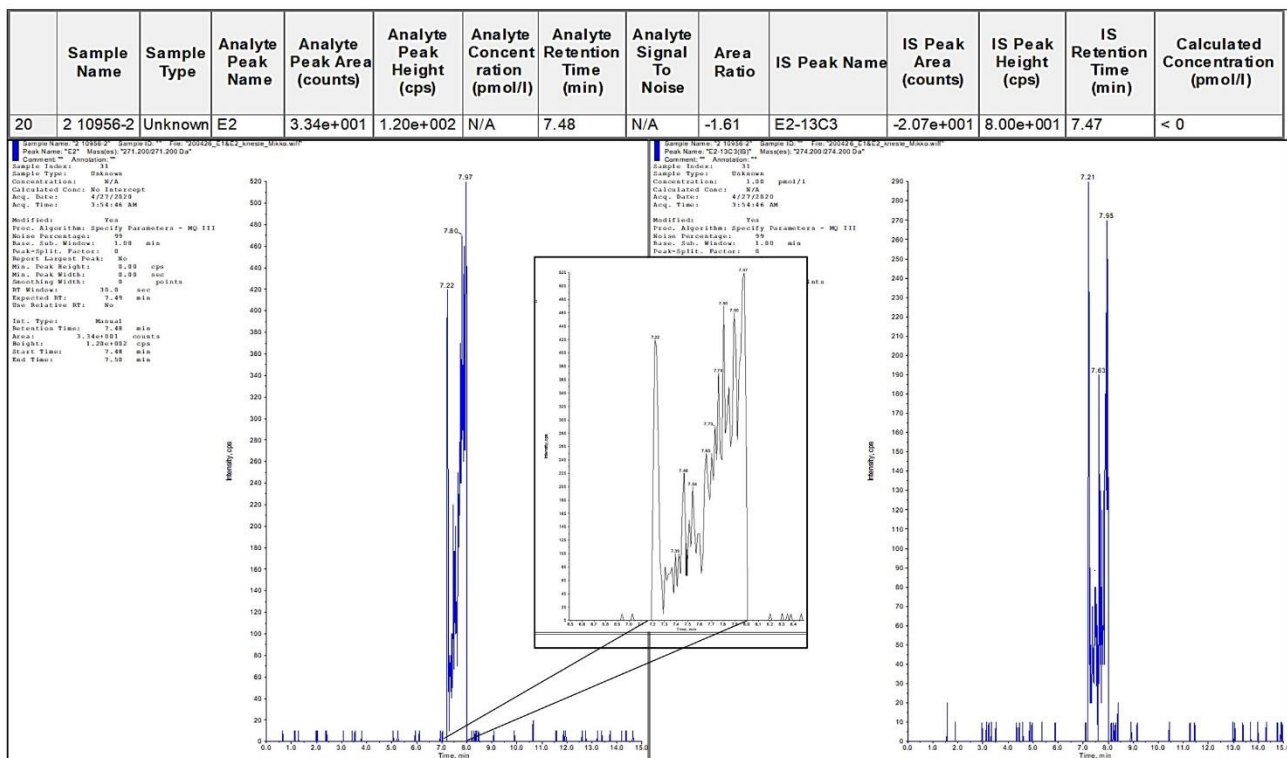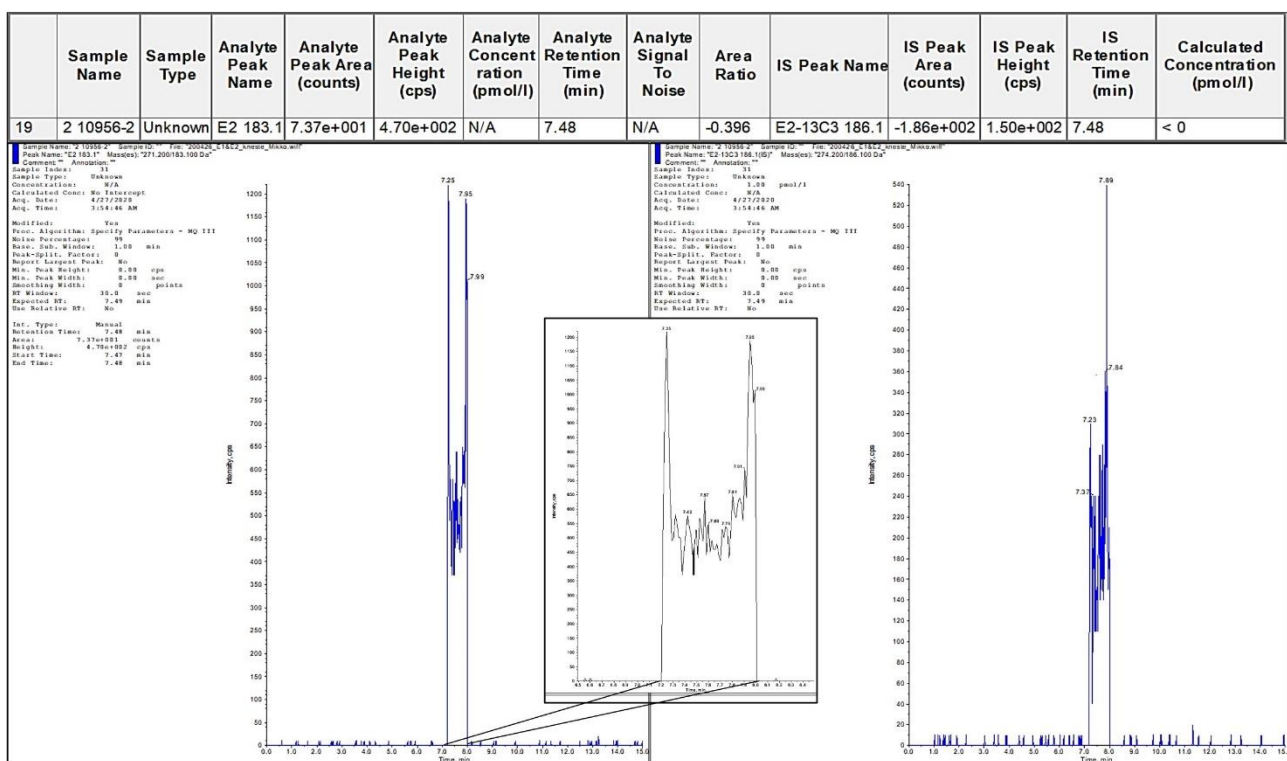

**Supplementary figure S1C: P4 chromatograms in blank samples.** Parent and transition ions P4 [M+H]<sup>+</sup> m/z 315.1 to m/z 109.1 and m/z 96.9 in 0 pmol/L standard sample and water blank sample. No internal standard was added to the water blank.



**Sample Name:** "S:\S-08.Pxy"    **Sample ID. #**: "000004\_PROG\_knox\_bkx.wit"    **Peak Name:** "PROG-12C3 112.1037"    **Mass(es)**: "315.100/100.100 Da"

**Comments:** "Annotation."

| Parameter                                     | Value                   |
|-----------------------------------------------|-------------------------|
| Sample Index:                                 | 4                       |
| Sample Type:                                  | Standard                |
| Calculated Conc:                              | 8.80000000000000 nmcl/l |
| Avg. Ret:                                     | 5/35/2028               |
| Acq. Time:                                    | 5/35:42 PM              |
| Modified:                                     | Yes                     |
| Param. Algorithms Specify Parameters - HQ III |                         |
| Noise Percentage:                             | 95                      |
| Base. Chn. Window:                            | 1.00 min                |
| PeakSplit. Factor:                            | 0                       |
| Report Target Peak:                           | No                      |
| Min. Peak Height:                             | 0.00 cps                |
| Min. Peak Width:                              | 0.00 sec                |
| Smoothing Width:                              | 0 points                |
| HF Window:                                    | 30.0 sec                |
| Repetited HF:                                 | 11.6 min                |
| Use Relative HF:                              | No                      |
| Int. Type:                                    | Manual                  |
| Integration Time:                             | 11.6 min                |
| Area:                                         | 7.31e+002 counts        |
| Height:                                       | 2.34e+002 cps           |
| Start Time:                                   | 11.6 min                |
| End Time:                                     | 11.6 min                |

**Sample Name:** "S:\S-08.Pxy"    **Sample ID. #**: "000004\_PROG\_knox\_bkx.wit"    **Peak Name:** "PROG-12C3 112.1037"    **Mass(es)**: "315.100/100.100 Da"

**Comments:** "Annotation."

| Parameter                                     | Value                   |
|-----------------------------------------------|-------------------------|
| Sample Index:                                 | 4                       |
| Sample Type:                                  | Standard                |
| Calculated Conc:                              | 8.80000000000000 nmcl/l |
| Avg. Ret:                                     | 5/35/2028               |
| Acq. Time:                                    | 5/35:42 PM              |
| Modified:                                     | Yes                     |
| Param. Algorithms Specify Parameters - HQ III |                         |
| Noise Percentage:                             | 95                      |
| Base. Chn. Window:                            | 1.00 min                |
| PeakSplit. Factor:                            | 0                       |
| Report Target Peak:                           | No                      |
| Min. Peak Height:                             | 0.00 cps                |
| Min. Peak Width:                              | 0.00 sec                |
| Smoothing Width:                              | 0 points                |

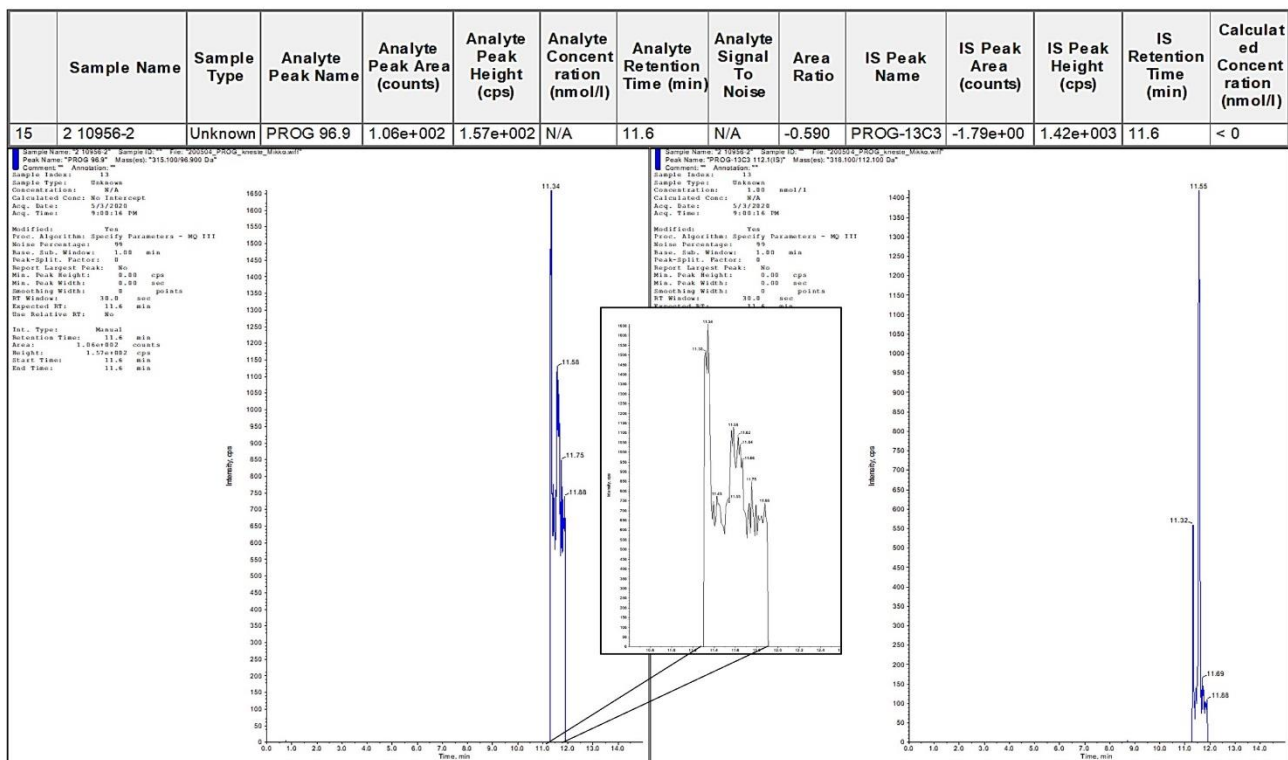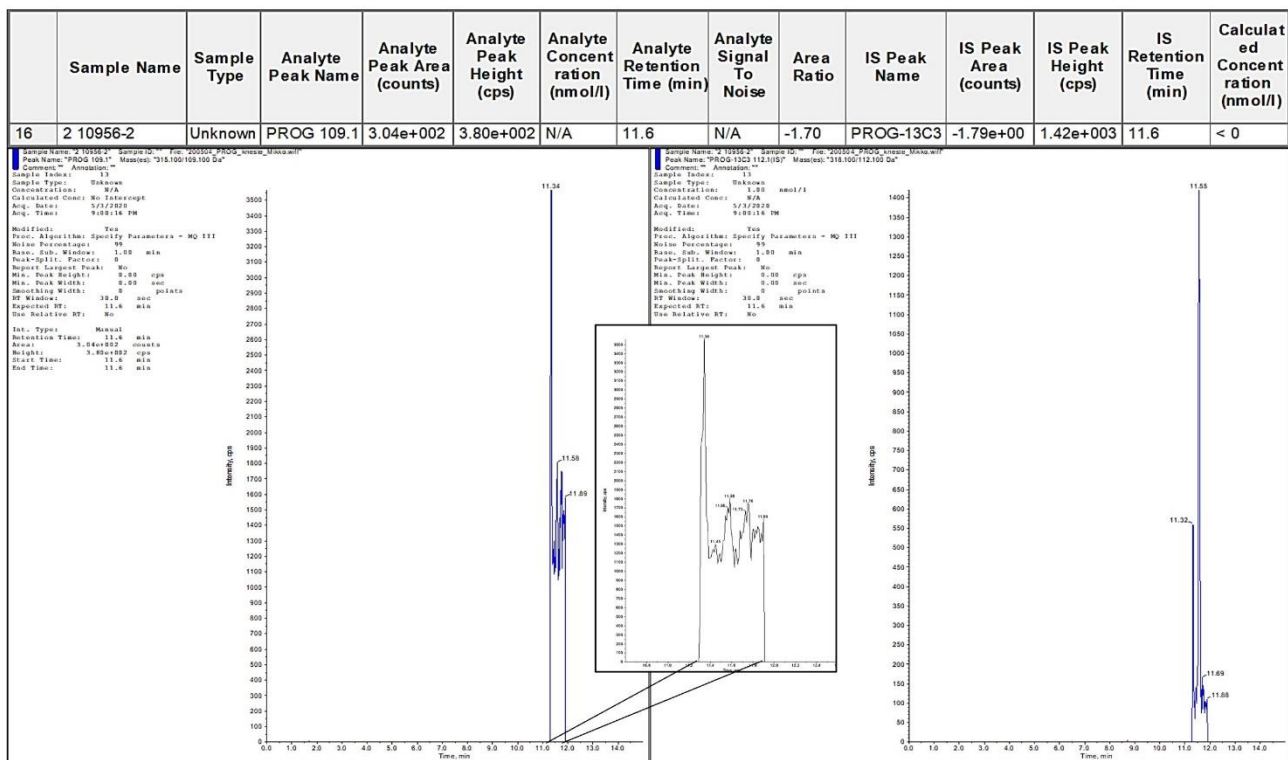

**Supplementary figure S1D: T4 chromatograms in blank samples.** Parent and transition ions T4 [M+H]<sup>+</sup> m/z 289.1 to m/z 109.1 and m/z 97.0 in 0 pmol/L standard sample and water blank sample. No internal standard was added to the water blank.

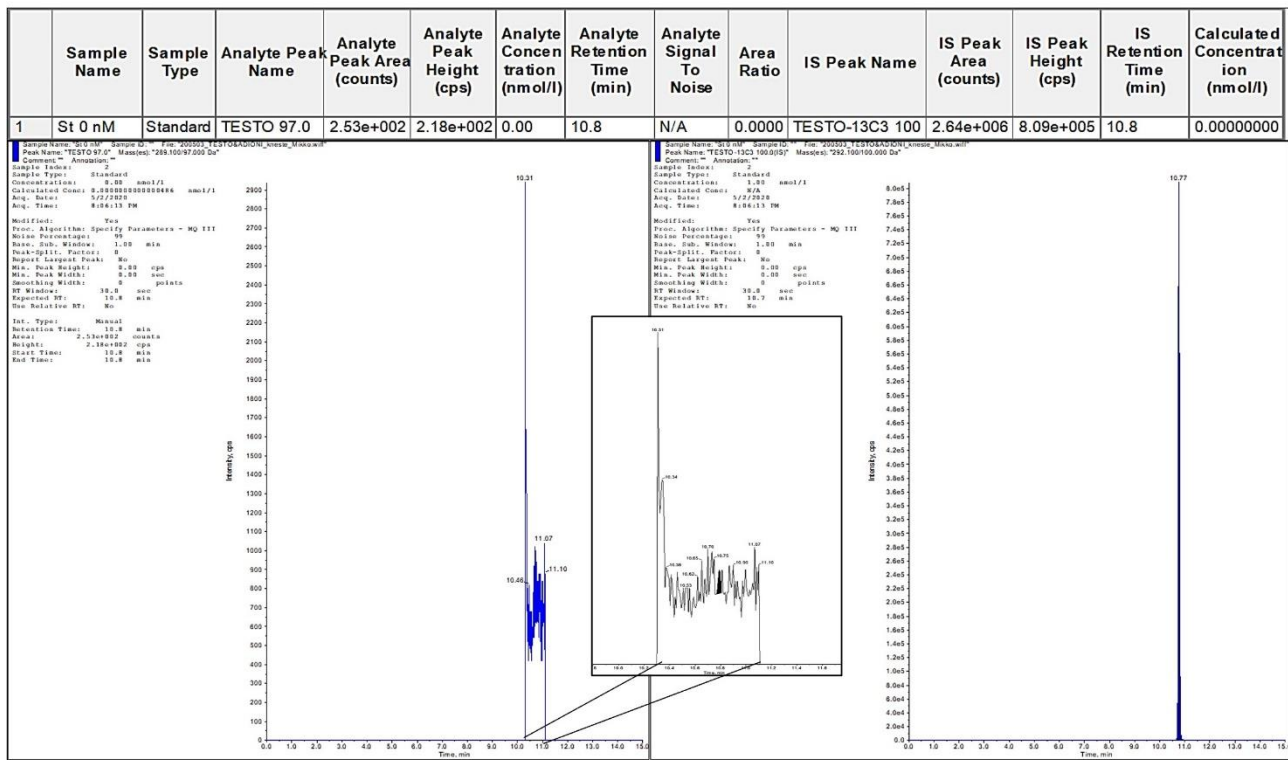

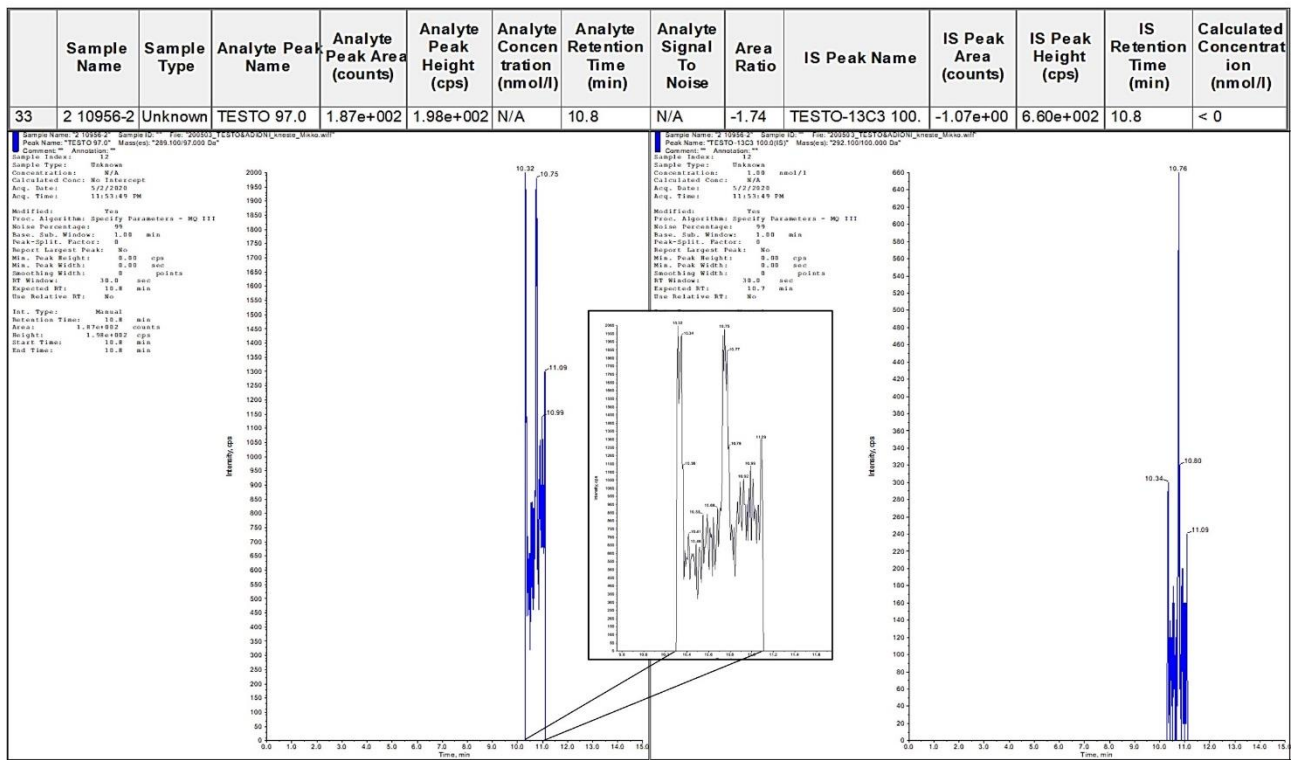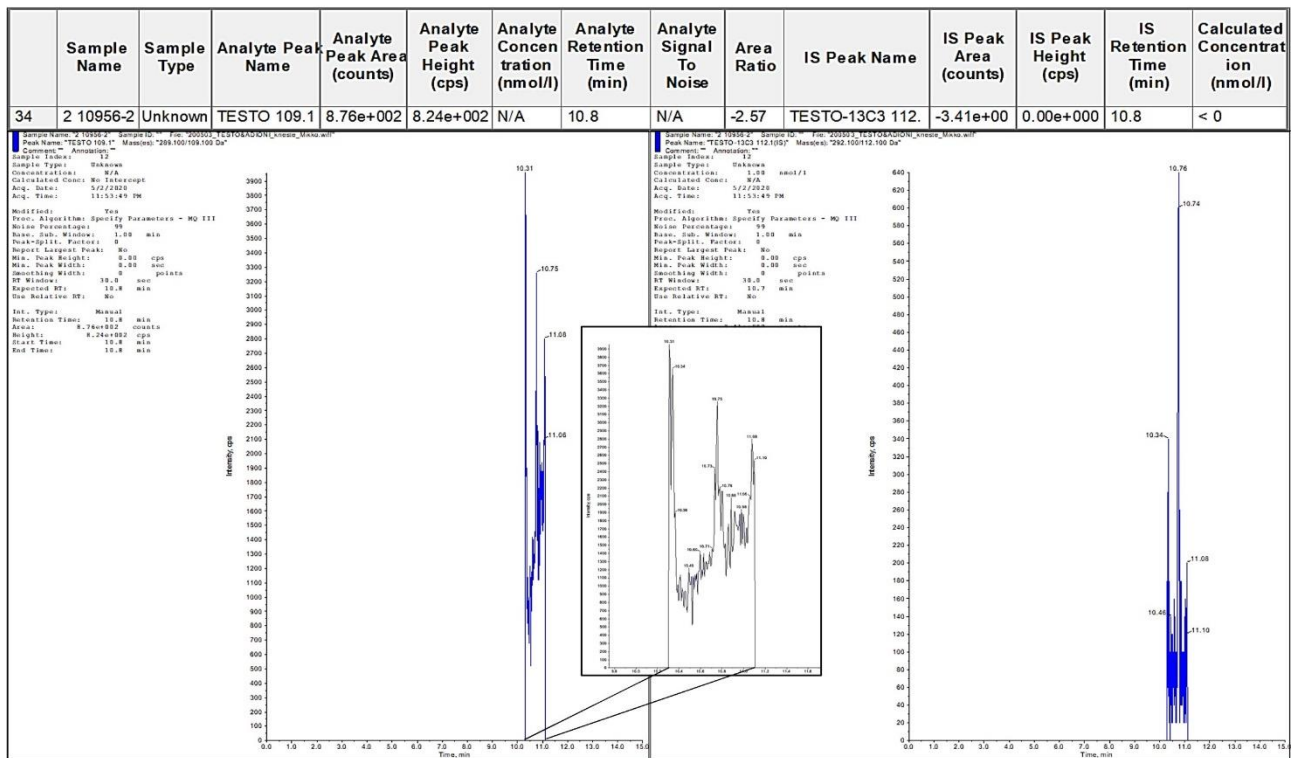

**Supplementary figure S1E: A4 chromatograms in blank samples.** Parent and transition ions A4 [M+H]<sup>+</sup> m/z 287.1 to m/z 109.2 and m/z 97.2 in 0 pmol/L standard sample and water blank sample. No internal standard was added to the water blank.



|   | Sample Name | Sample Type | Analyte Peak Name | Analyte Peak Area (counts) | Analyte Peak Height (cps) | Analyte Concentration (nmol/l) | Analyte Retention Time (min) | Analyte Signal To Noise | Area Ratio | IS Peak Name   | IS Peak Area (counts) | IS Peak Height (cps) | IS Retention Time (min) | Calculated Concentration (nmol/l) |
|---|-------------|-------------|-------------------|----------------------------|---------------------------|--------------------------------|------------------------------|-------------------------|------------|----------------|-----------------------|----------------------|-------------------------|-----------------------------------|
| 3 | St 0 nM     | Standard    | ADIONI-97.2       | 3.15e+003                  | 1.90e+003                 | 0.00                           | 10.7                         | N/A                     | 0.0012     | ADIONI-13C3 10 | 2.52e+006             | 7.81e+005            | 10.7                    | 0.00000000                        |

Sample Name: St 0 nM Sample ID: File: 000003\_123.D\\DATA\\ADIONI\_97.2\_Massvol  
Peak Name: "ADIONI-97.2" Masses: "287.100/67.200/284"  
Concave: "Amidation,"  
Sample Index: 2  
Sample Type: Standard  
Concentration: 0.00 nmol/l  
Calculated Conc: 0.0000000000000000 nmol/l  
Acq. Date: 5/2/2028  
Acq. Time: 8:08:13 PM  
  
Modified: Yes  
Proc. Algorithm: Specify Parameters - HQ ITI  
Ratio Percentages: 95  
Base, Sub. Window: 1.00 min  
Peak-Split, Points: 0  
Report Largest Peak: No  
Min., Peak Height: 0.00 cps  
Max., Peak Width: 0.00 sec  
Smoothing Width: 0 points  
ST Window: 10.0 sec  
Expected RT: 10.7 min  
Use Relative RT: No  
  
Int. Type: Manual  
Retention Time: 10.7 min  
Area: 3.15e+003 counts  
Height: 1.90e+003 cps  
Start Time: 10.7 min  
End Time: 10.7 min

Sample Name: St 0 nM Sample ID: File: 000003\_123.D\\DATA\\ADIONI\_97.2\_Massvol  
Peak Name: "ADIONI-13C3 100.2087" Masses: "290.160/100.200/284"  
Concave: "Amidation,"  
Sample Index: 2  
Sample Type: Standard  
Concentration: 1.00 nmol/l  
Calculated Conc: N/A  
Acq. Date: 5/2/2028  
Acq. Time: 8:08:13 PM  
  
Modified: Yes  
Proc. Algorithm: Specify Parameters - HQ ITI  
Ratio Percentages: 95  
Base, Sub. Window: 1.00 min  
Peak-Split, Points: 0  
Report Largest Peak: No  
Min., Peak Height: 0.00 cps  
Max., Peak Width: 0.00 sec  
Smoothing Width: 0 points  
ST Window: 10.0 sec  
Expected RT: 10.7 min  
Use Relative RT: No  
  
Int. Type: Manual  
Retention Time: 10.7 min  
Area: 2.52e+006 counts  
Height: 7.81e+005 cps  
Start Time: 10.7 min  
End Time: 10.7 min

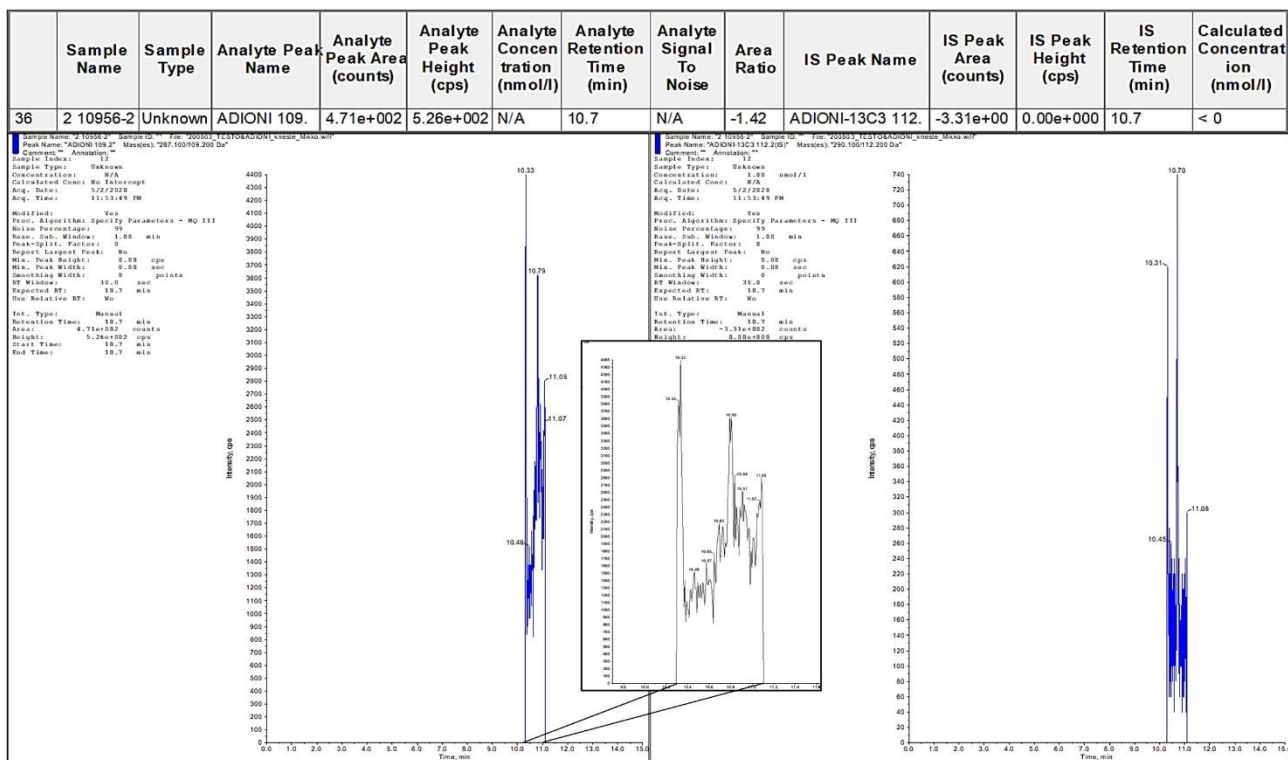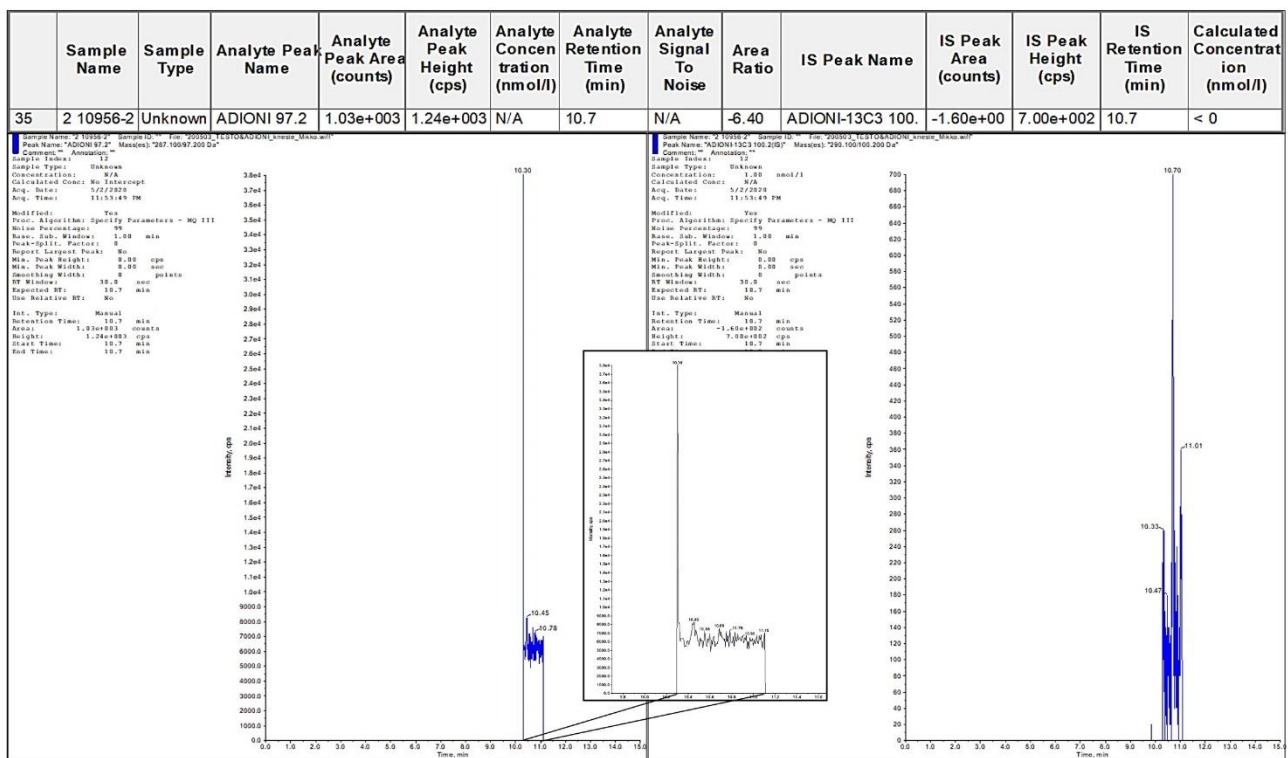

**Supplementary figure S1F: DHEA chromatograms in blank samples.** Parent and transition ions [M+NH<sub>4</sub>]<sup>+</sup> m/z 306.1 to m/z 253.1 and m/z 213.3 in 0 pmol/L standard sample and water blank sample. No internal standard was added to the water blank.

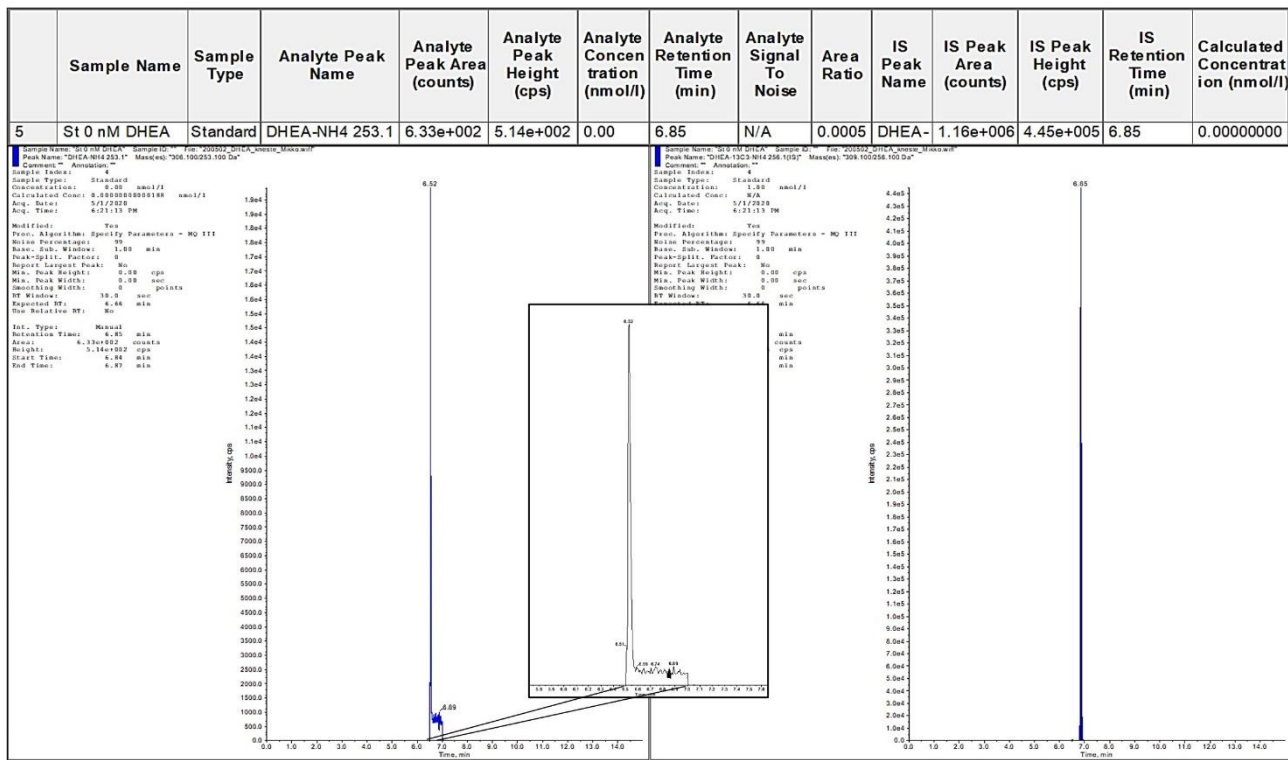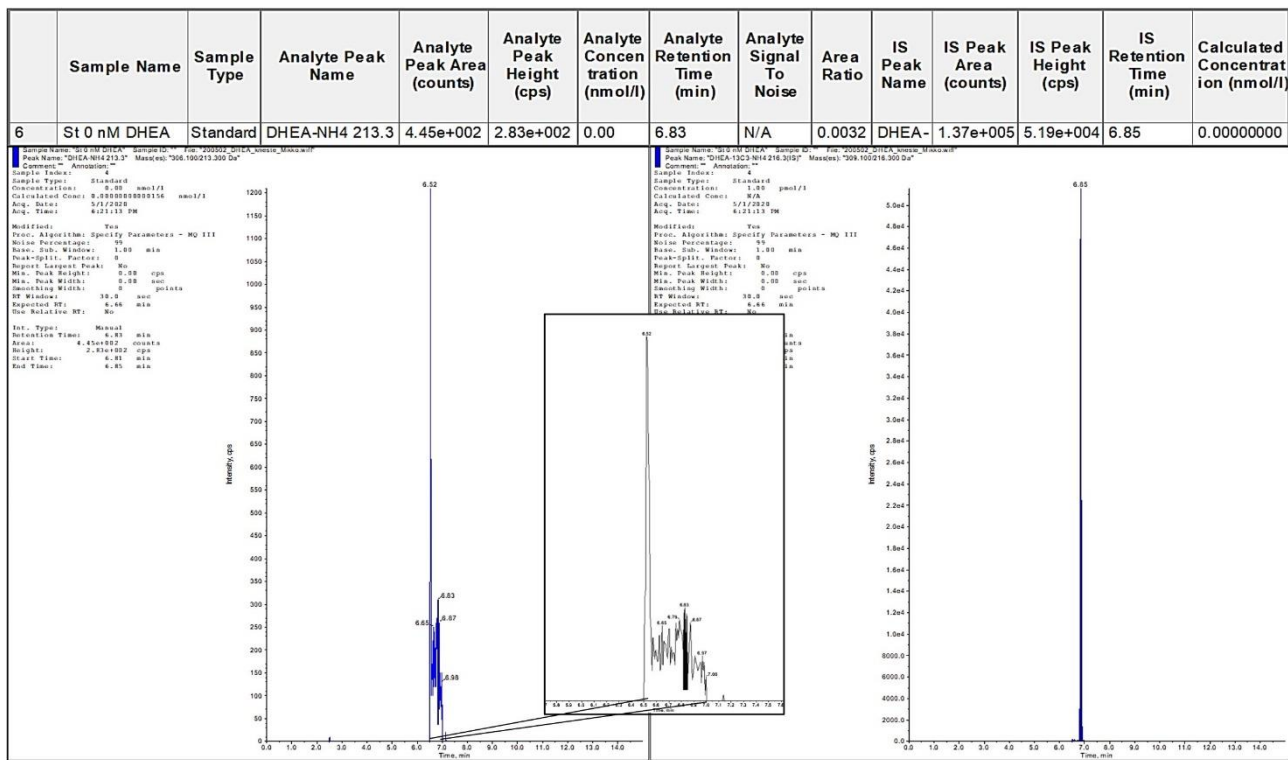

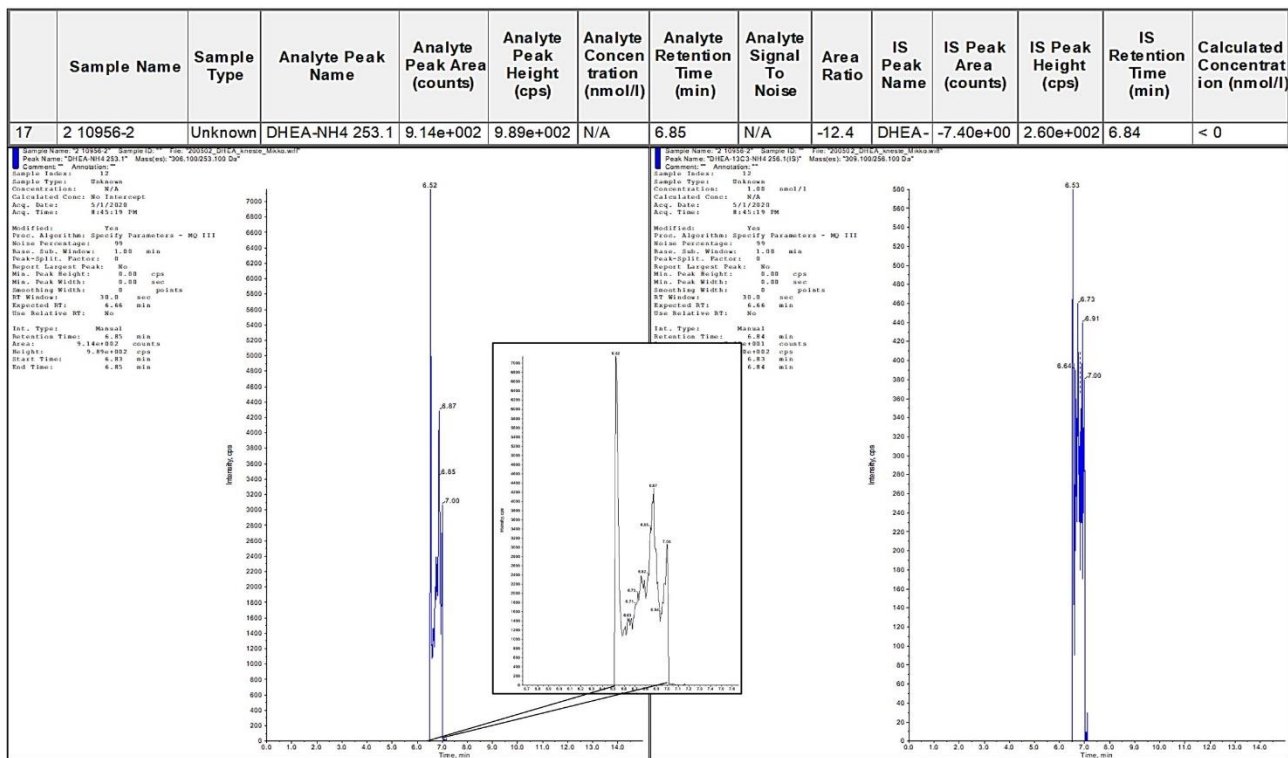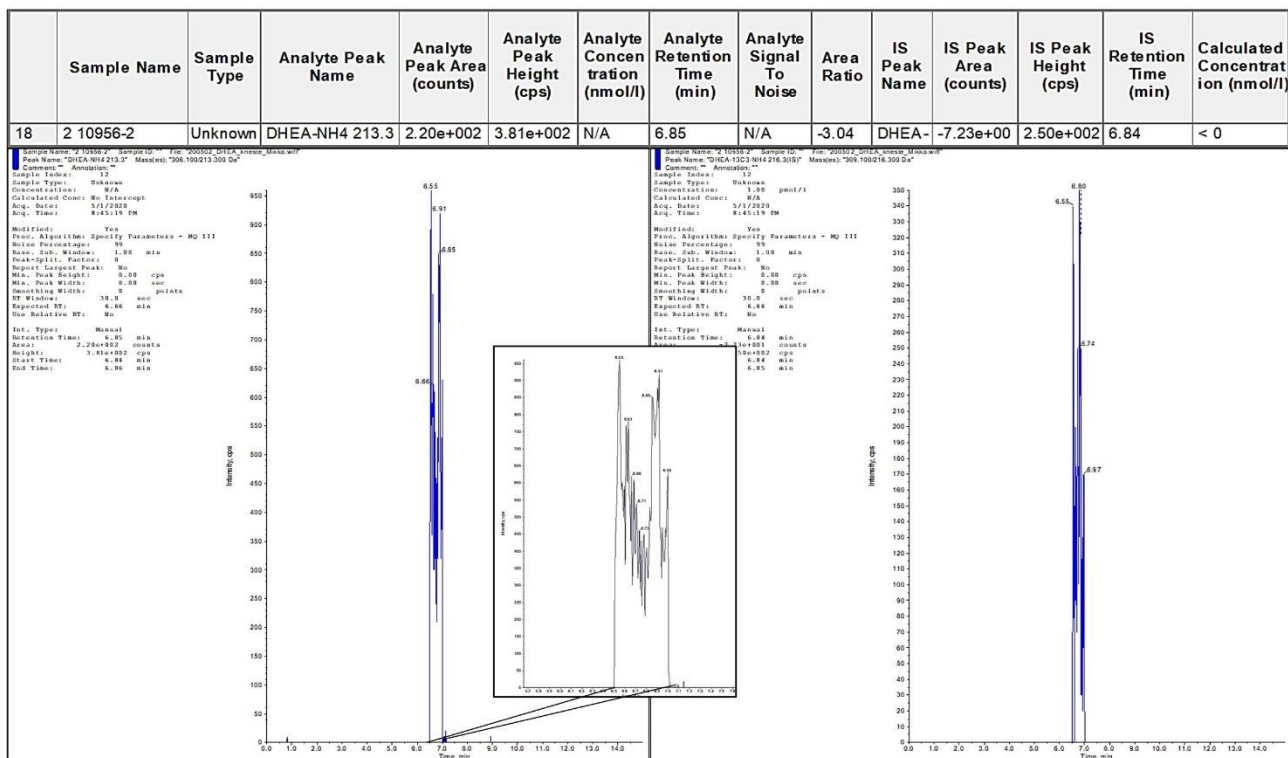

**Supplementary figure S2A: E1 LOQ chromatogram and S/N ratios.** Parent and transition ions E<sub>1</sub> [M-H]<sup>-</sup> m/z 269.1 to m/z 269.1 and m/z 145.0 in 10 pmol/L standard sample. Left panel shows calibrator chromatogram, while on the right is presented <sup>13</sup>C-estrone IS. The high S/N ratio (36.5 and 26.6, respectively) permitted extrapolation of the LOQ to 5 pmol/L.



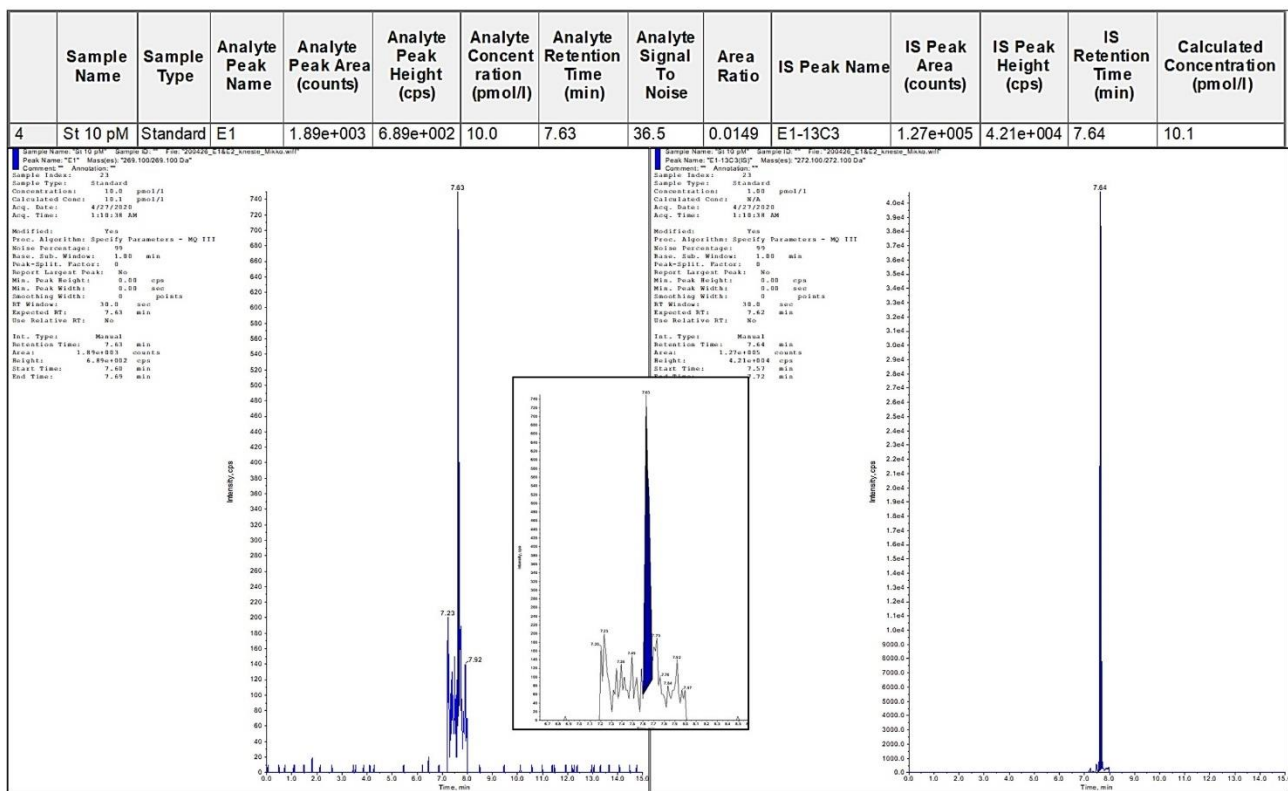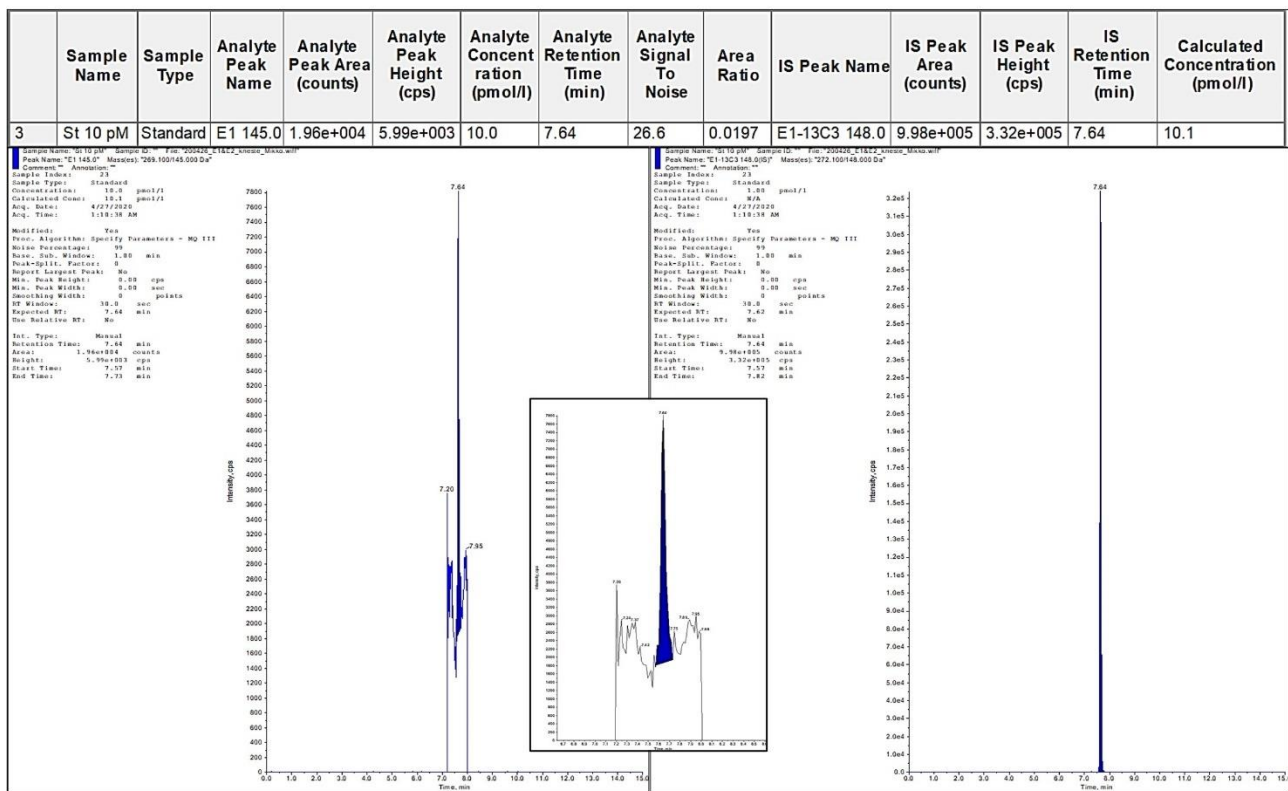

**Supplementary figure S2B: E2 LOQ chromatogram and S/N ratios.** Parent and transition ions E<sub>2</sub> [M-H]<sup>-</sup> m/z 271.2 to m/z 271.2 and m/z 183.1 in 10 pmol/L standard sample. Left panel shows calibrator chromatogram, while on the right is presented <sup>13</sup>C-estradiol IS. The high S/N ratio permitted extrapolation of the LOQ to 5 pmol/L.

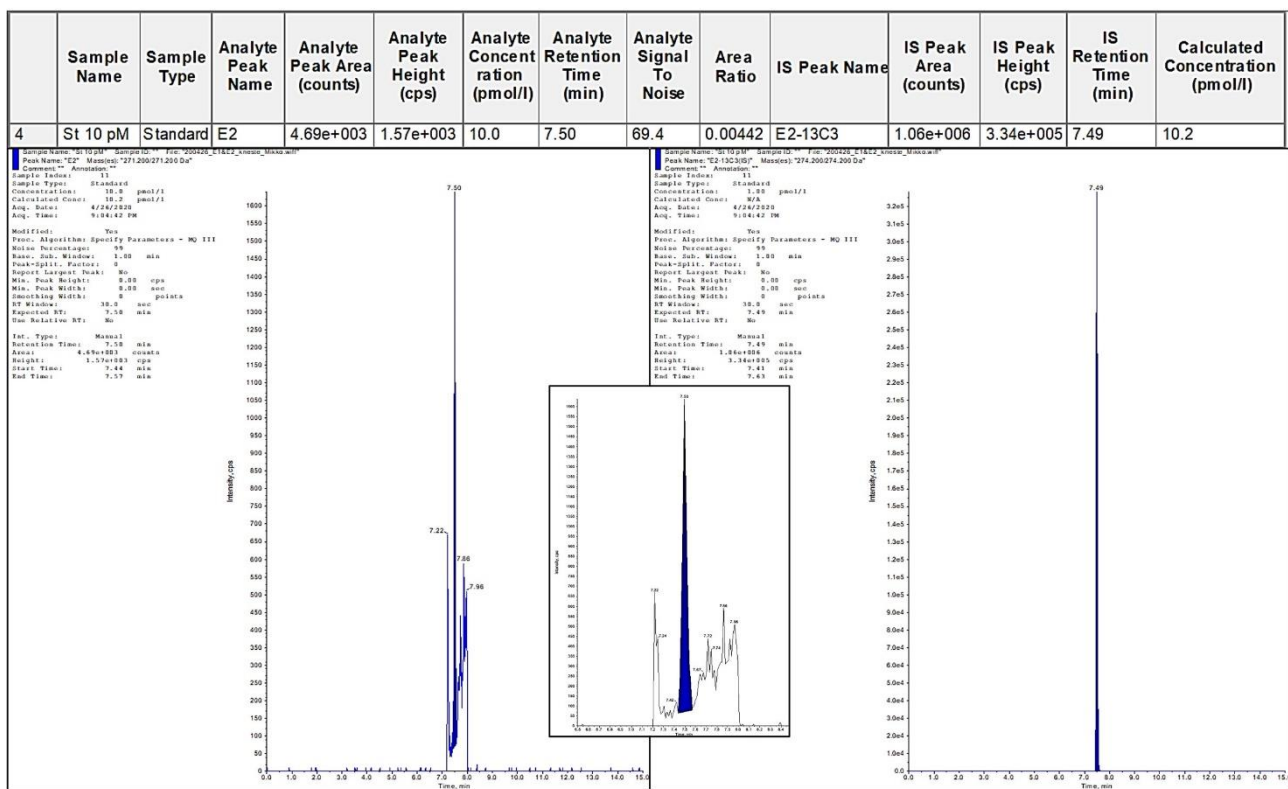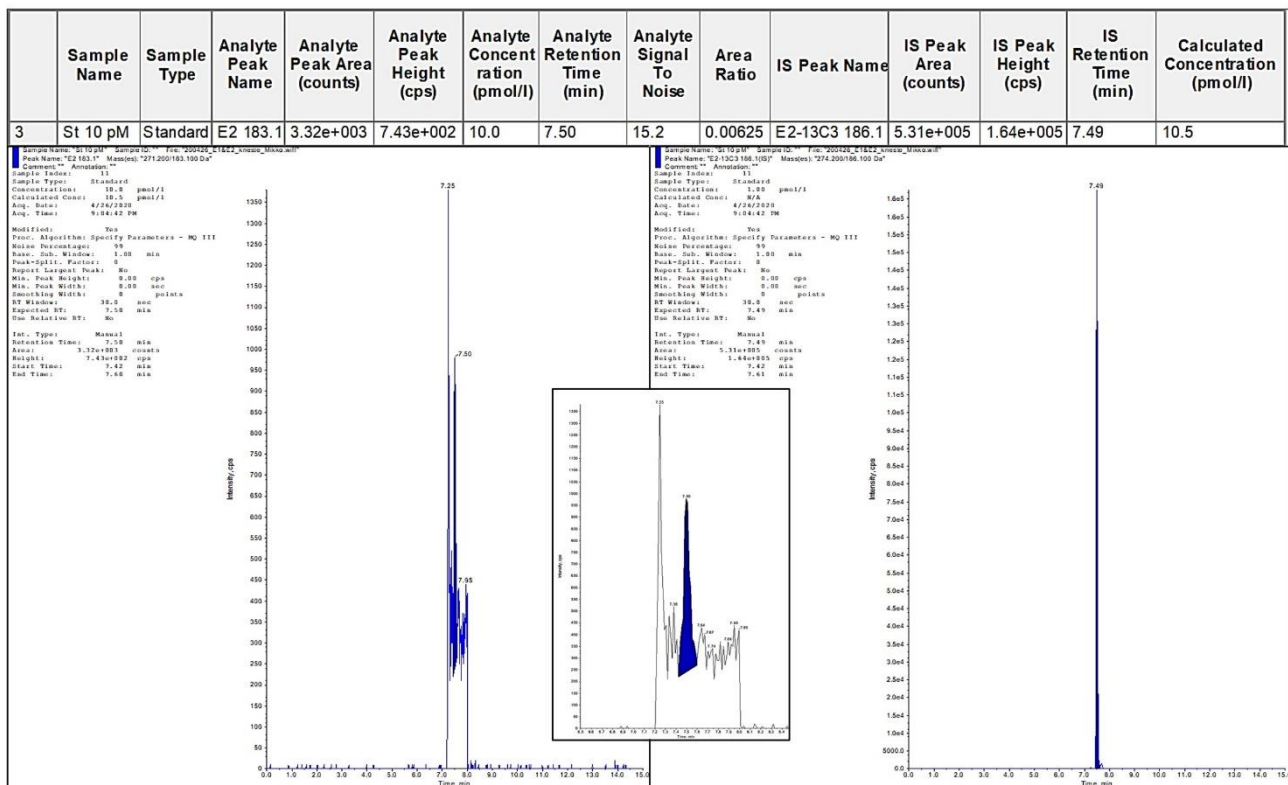

**Supplementary figure S2C: P4 LOQ chromatogram and S/N ratios.** Parent and transition ions P4 [M+H]<sup>+</sup> m/z 315.1 to m/z 109.1 and m/z 96.9 in 50 pmol/L standard sample (S/N=132). Left panel shows calibrator chromatogram, while on the right is presented <sup>13</sup>C-progesterone IS. The high S/N ratio permitted extrapolation of the LOQ to 10 pmol/L.

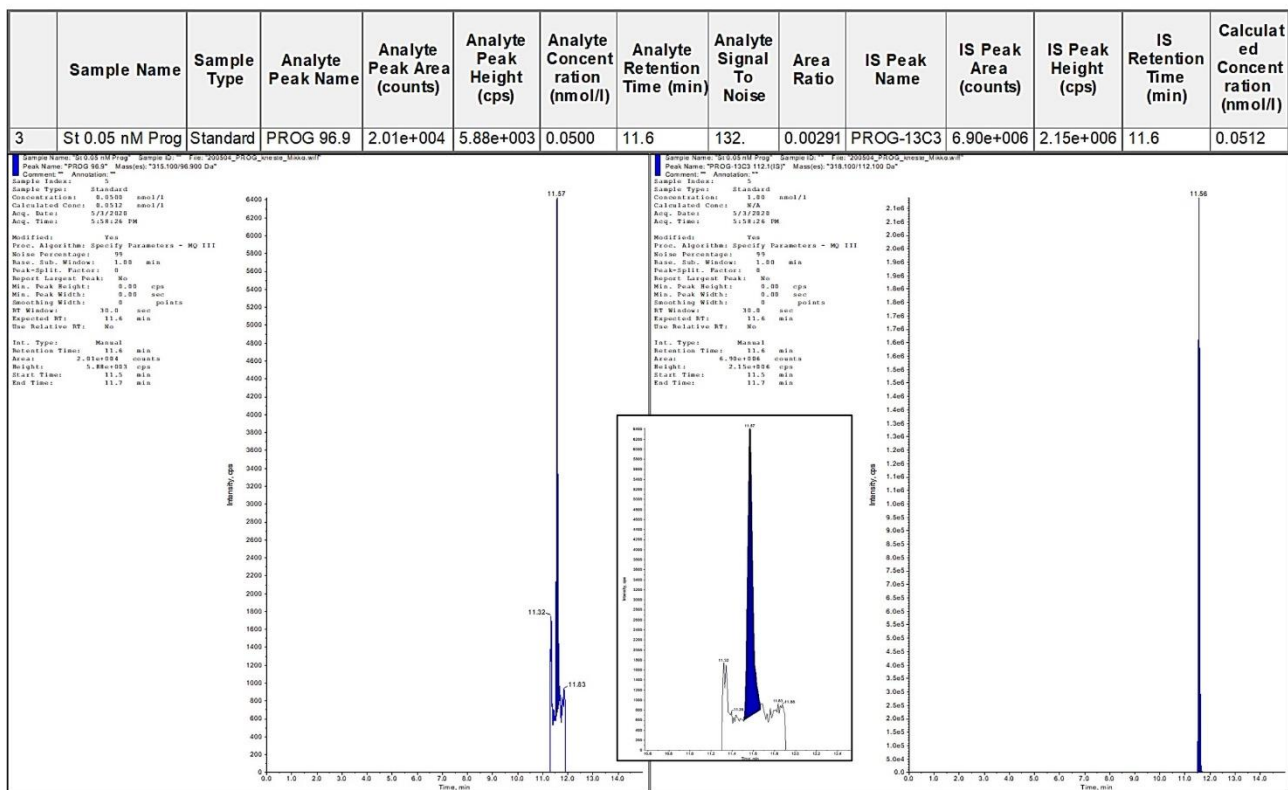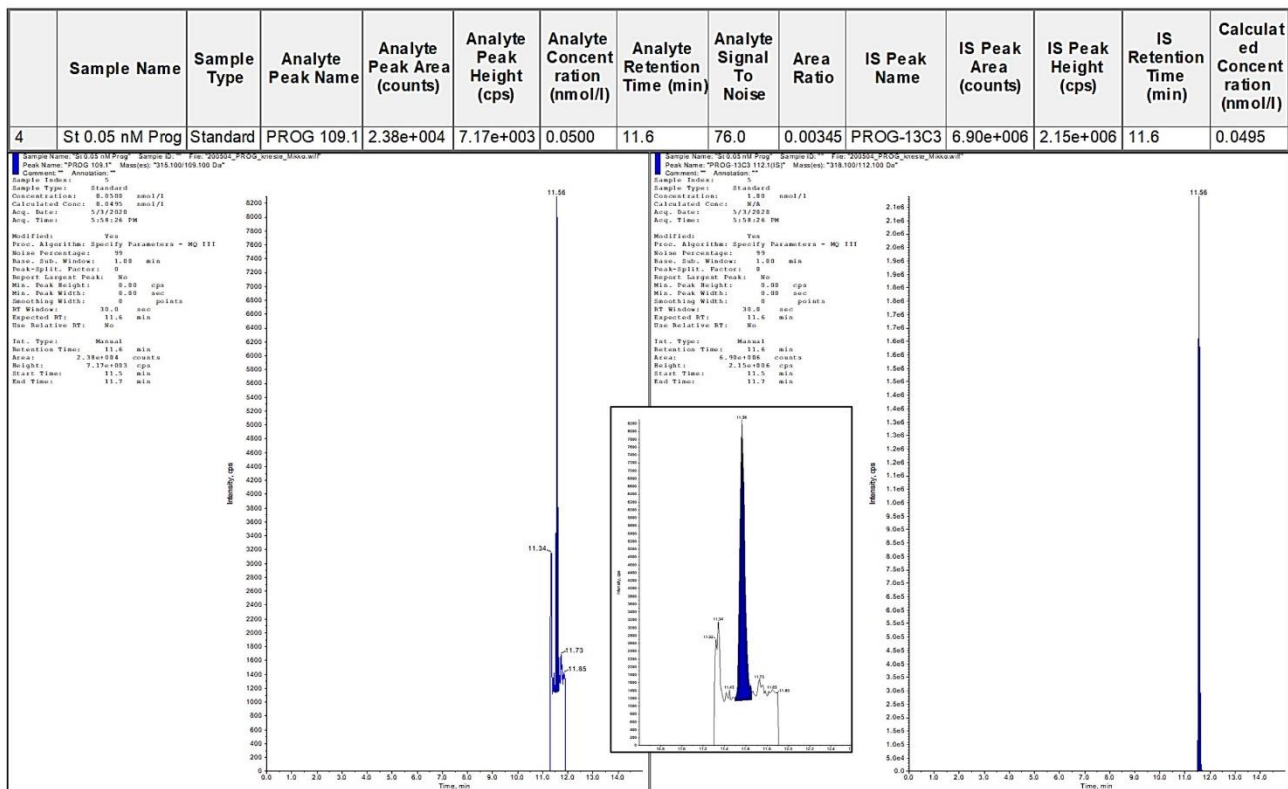

**Supplementary figure S2D: T4 LOQ chromatogram and S/N ratios.** Parent and transition ions T4 [M+H]<sup>+</sup> m/z 289.1 to m/z 109.1 and m/z 97.0 in 50 pmol/L standard sample (S/N=99.5). Left panel shows calibrator chromatogram, while on the right is presented <sup>13</sup>C-testosterone IS. The high S/N ratio permitted extrapolation of the LOQ to 10 pmol/L.

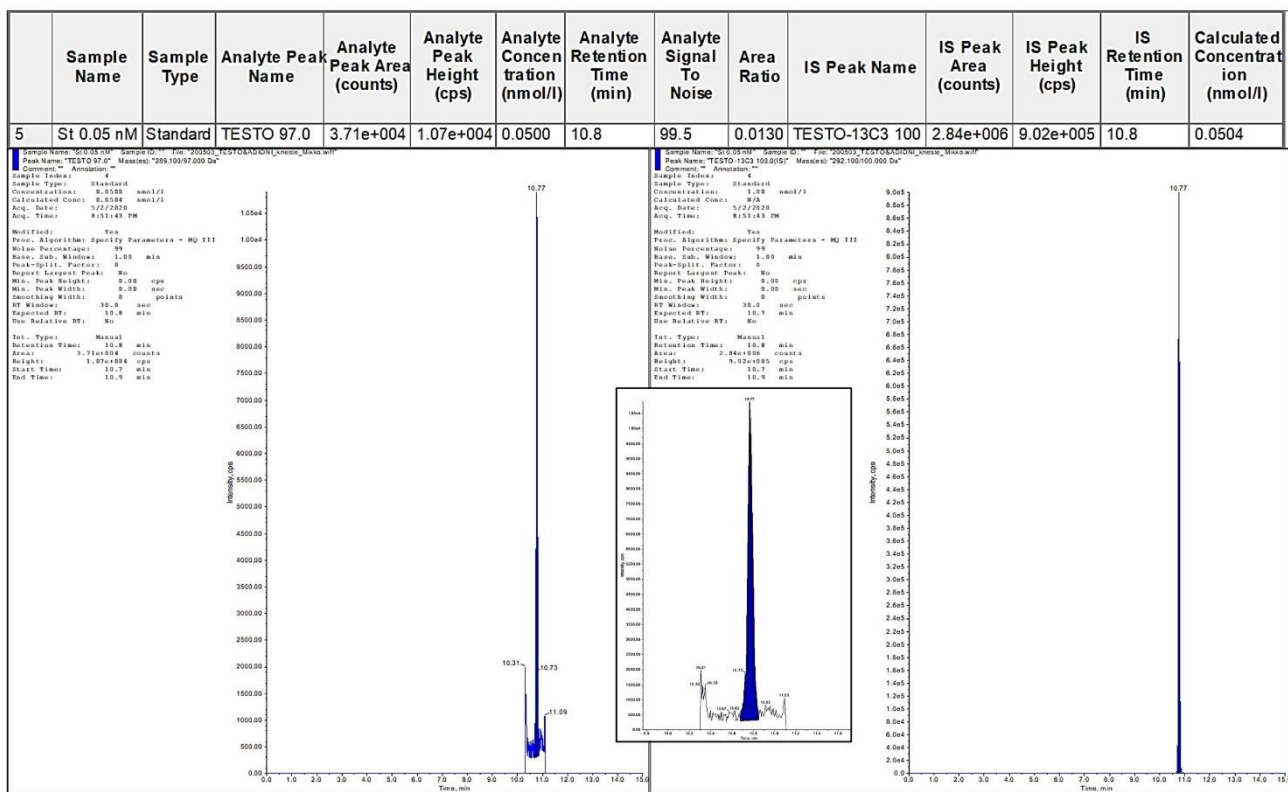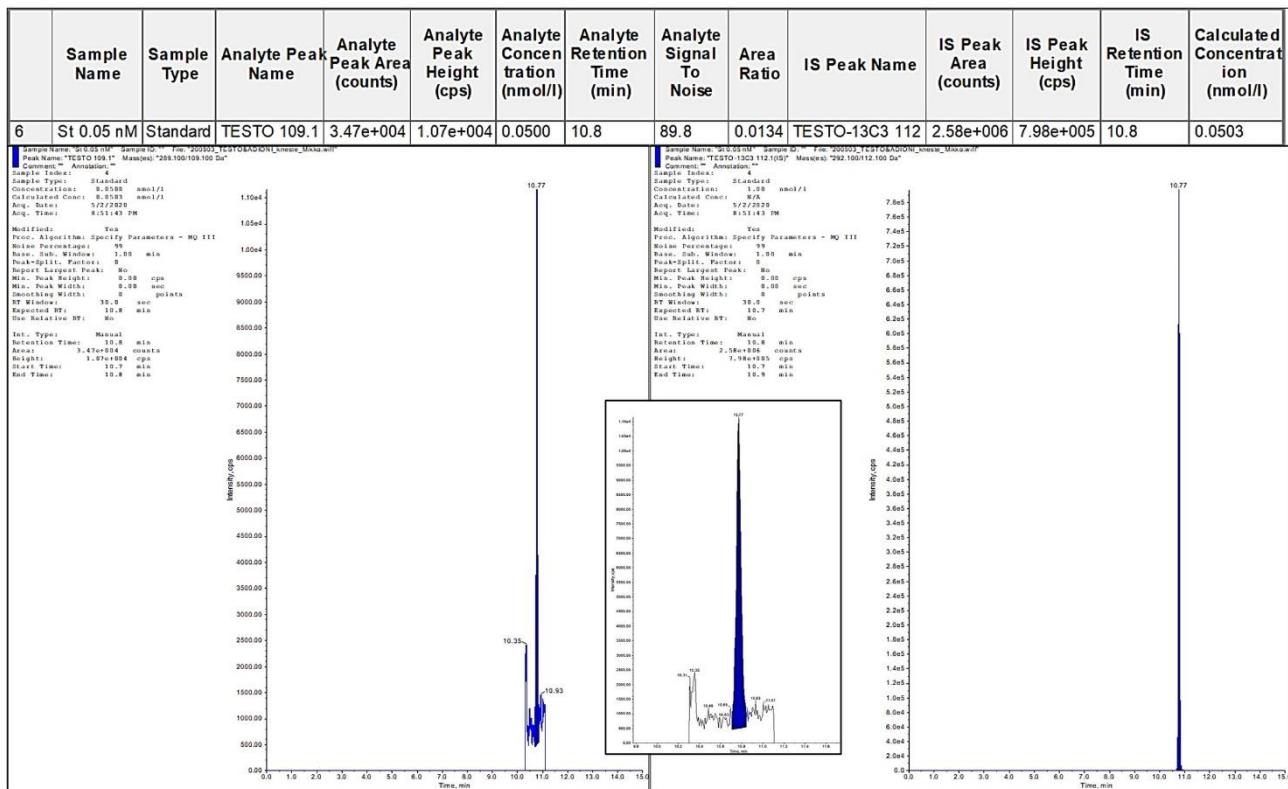

**Supplementary figure S2E: A4 LOQ chromatogram and S/N ratios.** Parent and transition ions A4 [M+H]<sup>+</sup> m/z 287.1 to m/z 109.2 and m/z 97.2 in 50 pmol/L standard sample (S/N=171.0). Left panel shows calibrator chromatogram, while on the right is presented <sup>13</sup>C-androstenedione IS. The high S/N ratio permitted extrapolation of the LOQ to 10 pmol/L.



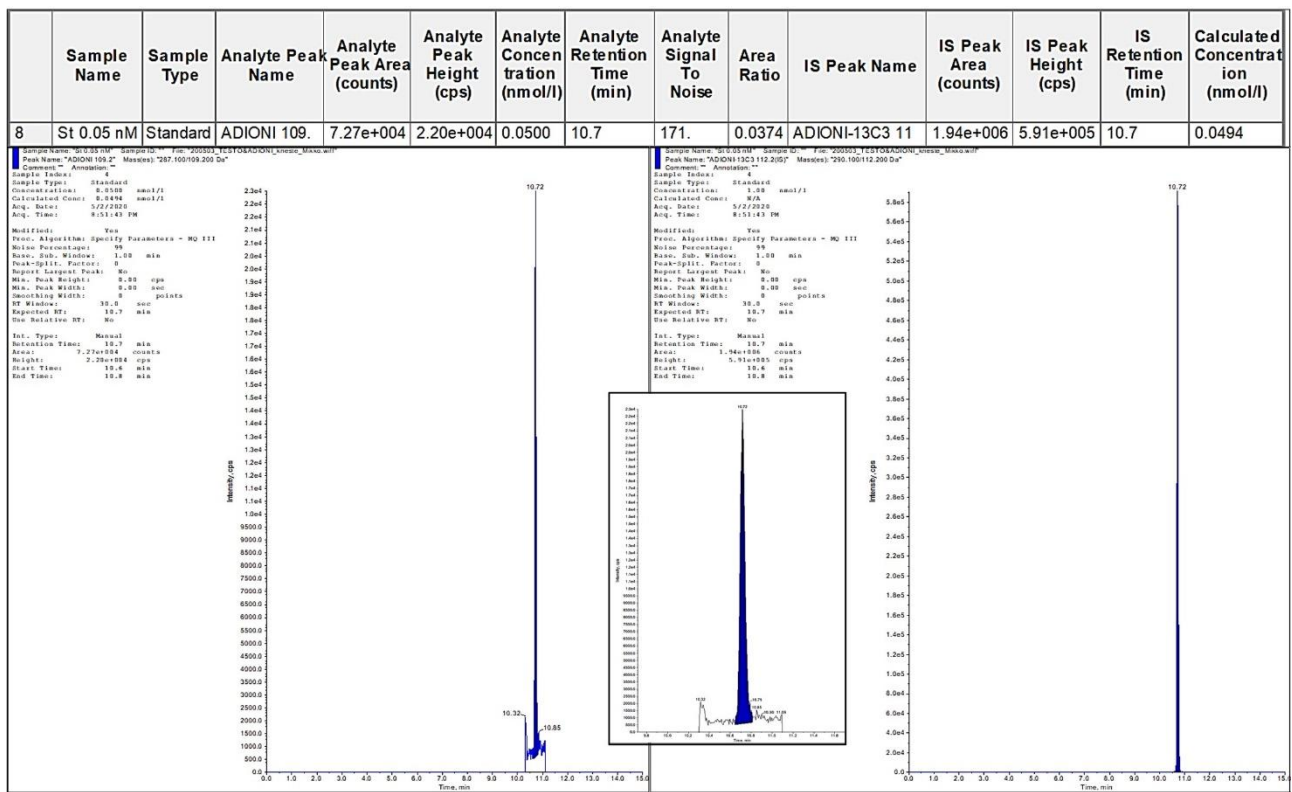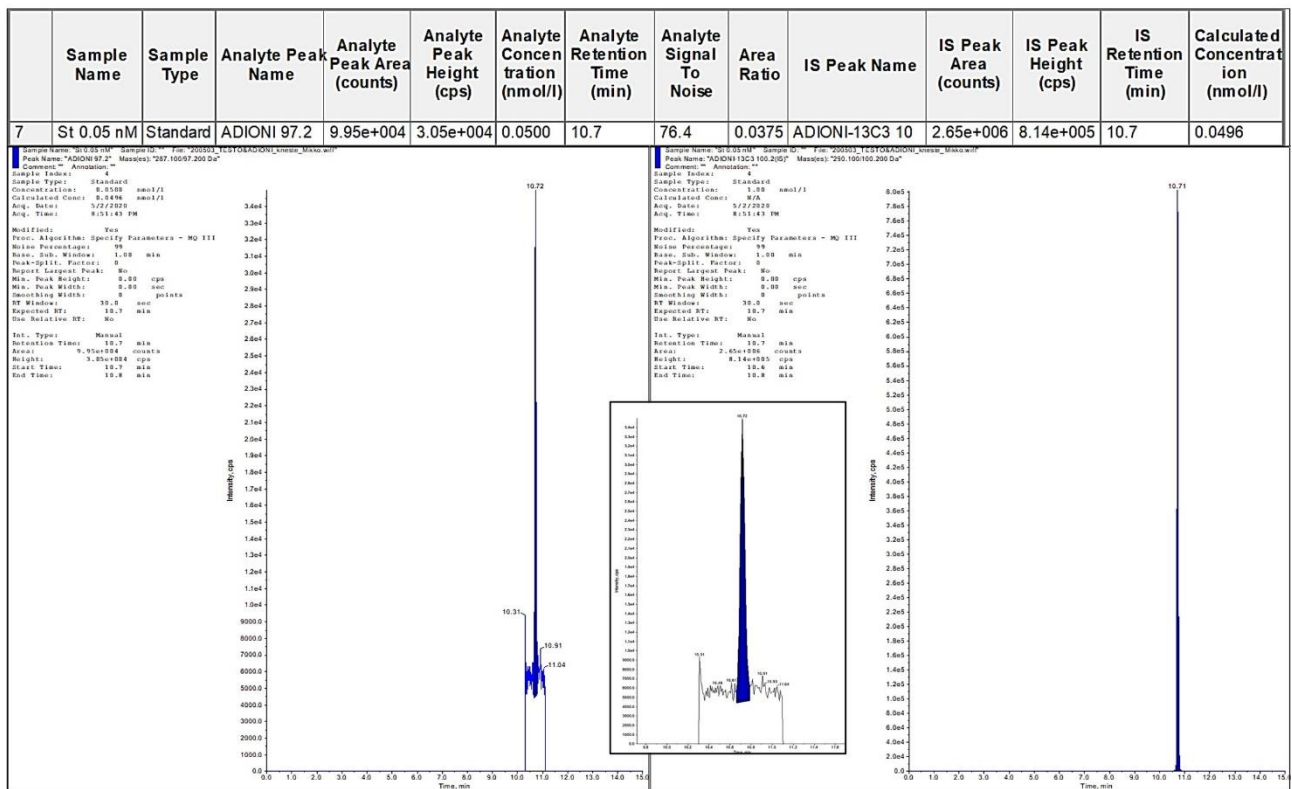

**Supplementary figure S2F: DHEA-LOQ chromatogram and S/N ratios.** Parent and transition ions – ammonium adduct [M+NH<sub>4</sub>]<sup>+</sup> m/z 306.1 to m/z 253.1 and m/z 213.3 in 0.5 nmol/L standard sample (S/N=182.0). Left panel shows calibrator chromatogram, while on the right is presented <sup>13</sup>C-DHEA IS. The high S/N ratio permitted extrapolation of the LOQ to 0.1 nmol/L.

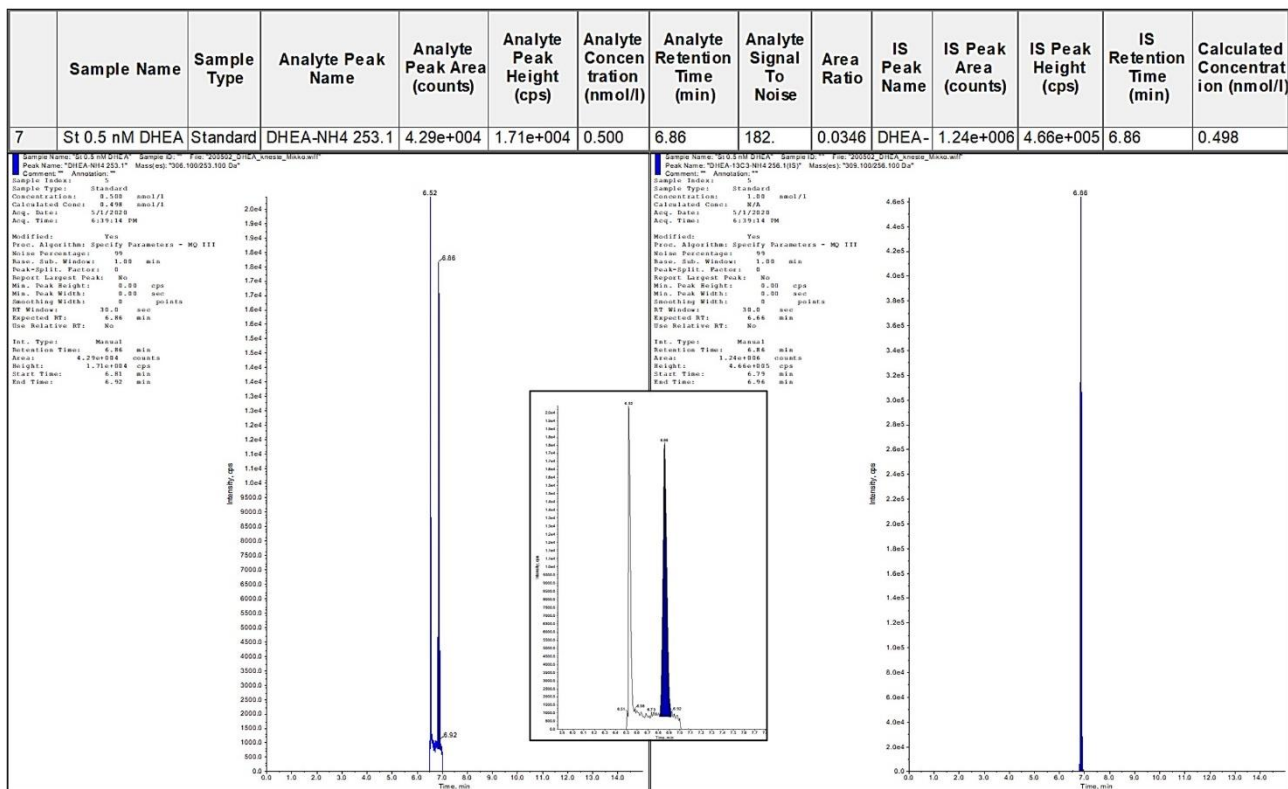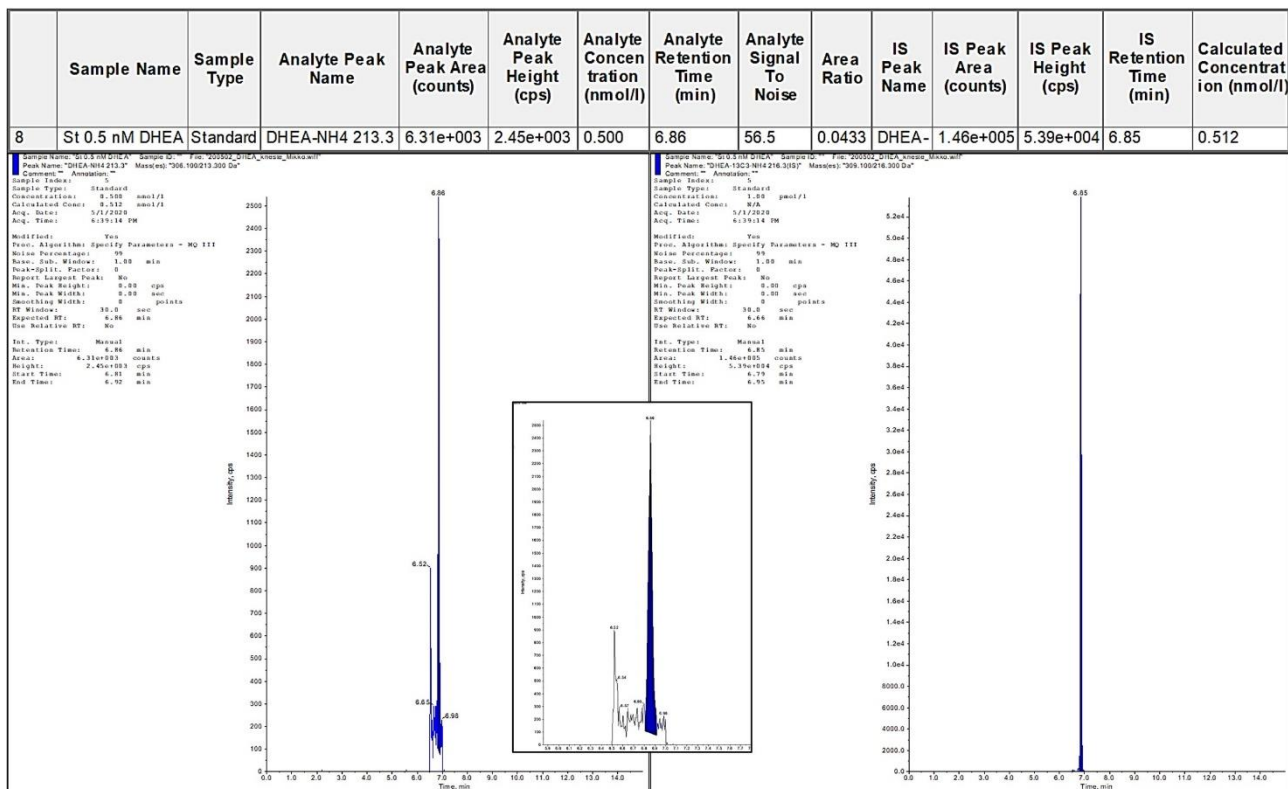

**Supplementary figure S3: T4 .** Parent and transition T4 [M+H]<sup>+</sup> m/z 289.1 to m/z 109.1 and m/z 97.0. Left panel shows analyte chromatogram, while on the right <sup>13</sup>C-testosterone IS.

| a  | Sample Name | Sample Type | Analyte Peak Name | Analyte Peak Area (counts) | Analyte Peak Height (cps) | Analyte Concentration (nmol/l) | Analyte Retention Time (min) | Analyte Signal To Noise | Area Ratio | IS Peak Name | IS Peak Area (counts) | IS Peak Height (cps) | IS Retention Time (min) | Calculated Concentration (nmol/l) |
|----|-------------|-------------|-------------------|----------------------------|---------------------------|--------------------------------|------------------------------|-------------------------|------------|--------------|-----------------------|----------------------|-------------------------|-----------------------------------|
| 85 | 15 10956-15 | Unknown     | TESTO 97.0        | 3.67e+005                  | 1.10e+005                 | N/A                            | 10.8                         | 954.                    | 0.0472     | TESTO-13C3   | 7.77e+006             | 2.48e+006            | 10.8                    | 0.801                             |

Sample Name: 15 10956-15 Sample ID: 200593\_1510956-15\_Unknown\_Lineset\_Mass.wiff  
Peak Name: TESTO 97.0 Mass(es): 289.100/97.000 Da  
Comment: Annotation:  
Sample Index: 28  
Sample Type: Unknown  
Concentration: N/A  
Calculated Count: 8.883 nmol/l  
Acq. Date: 5/3/2023  
Acq. Time: 5:58:19 AM  
Modified: Yes  
Proc. Algorithm: Specific Parameters - HQ III  
Noise Percentage: 95  
Base. Sub. Window: 1.00 min  
Peak-Split. Factor: 0  
Report Largest Peak: No  
Min. Peak Height: 0.00 cps  
Min. Peak Width: 0.00 sec  
Smoothing Width: 0 points  
RT Window: 39.8 sec  
Expected RT: 10.8 min  
Use Relative RT: No  
Int. Type: Manual  
Retention Time: 10.8 min  
Area: 3.67e+005 counts  
Height: 1.10e+005 cps  
Start Time: 10.7 min  
End Time: 10.9 min

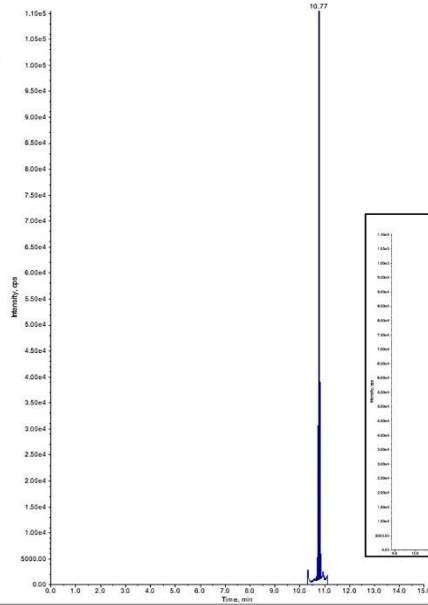

Sample Name: 15 10956-15 Sample ID: 200593\_1510956-15\_Unknown\_Lineset\_Mass.wiff  
Peak Name: TESTO-13C3 100.0157 Mass(es): 282.100/100.000 Da  
Comment: Annotation:  
Sample Index: 28  
Sample Type: Unknown  
Concentration: N/A  
Calculated Count: 9.94  
Acq. Date: 5/3/2023  
Acq. Time: 5:58:19 AM  
Modified: Yes  
Proc. Algorithm: Specific Parameters - HQ III  
Noise Percentage: 95  
Base. Sub. Window: 1.00 min  
Peak-Split. Factor: 0  
Report Largest Peak: No  
Min. Peak Height: 0.00 cps  
Min. Peak Width: 0.00 sec  
Smoothing Width: 0 points  
RT Window: 39.8 sec  
Expected RT: 10.7 min  
Use Relative RT: No  
Int. Type: Manual  
Retention Time: 10.8 min  
Area: 7.77e+006 counts  
Height: 2.48e+006 cps  
Start Time: 10.6 min  
End Time: 11.0 min

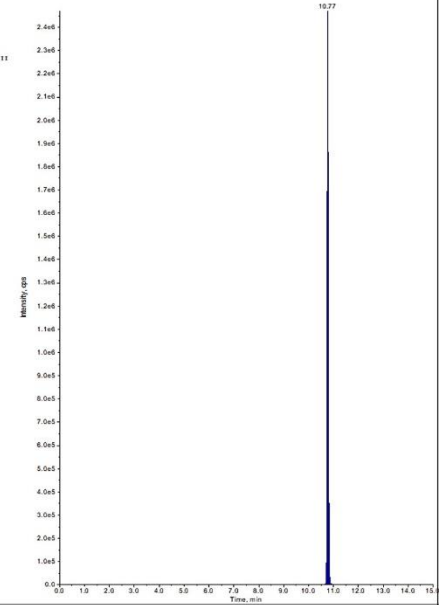

|    | Sample Name | Sample Type | Analyte Peak Name | Analyte Peak Area (counts) | Analyte Peak Height (cps) | Analyte Concentration (nmol/l) | Analyte Retention Time (min) | Analyte Signal To Noise | Area Ratio | IS Peak Name | IS Peak Area (counts) | IS Peak Height (cps) | IS Retention Time (min) | Calculated Concentration (nmol/l) |
|----|-------------|-------------|-------------------|----------------------------|---------------------------|--------------------------------|------------------------------|-------------------------|------------|--------------|-----------------------|----------------------|-------------------------|-----------------------------------|
| 86 | 15 10956-15 | Unknown     | TESTO 109.1       | 3.48e+005                  | 1.10e+005                 | N/A                            | 10.8                         | 405.                    | 0.0491     | TESTO-13C3   | 7.07e+006             | 2.29e+006            | 10.8                    | 0.833                             |

Sample Name: 15 10956-15 Sample ID: 200593\_1510956-15\_Unknown\_Lineset\_Mass.wiff  
Peak Name: TESTO 109.1 Mass(es): 289.100/109.100 Da  
Comment: Annotation:  
Sample Index: 28  
Sample Type: Unknown  
Concentration: N/A  
Calculated Count: 8.883 nmol/l  
Acq. Date: 5/3/2023  
Acq. Time: 5:58:19 AM  
Modified: Yes  
Proc. Algorithm: Specific Parameters - HQ III  
Noise Percentage: 95  
Base. Sub. Window: 1.00 min  
Peak-Split. Factor: 0  
Report Largest Peak: No  
Min. Peak Height: 0.00 cps  
Min. Peak Width: 0.00 sec  
Smoothing Width: 0 points  
RT Window: 39.8 sec  
Expected RT: 10.8 min  
Use Relative RT: No  
Int. Type: Manual  
Retention Time: 10.8 min  
Area: 3.48e+005 counts  
Height: 1.10e+005 cps  
Start Time: 10.7 min  
End Time: 10.9 min

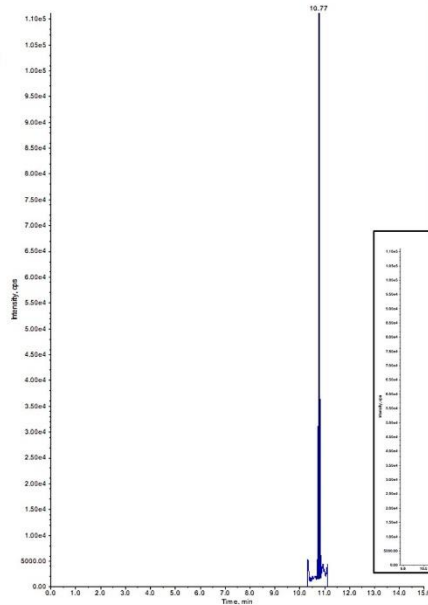

Sample Name: 15 10956-15 Sample ID: 200593\_1510956-15\_Unknown\_Lineset\_Mass.wiff  
Peak Name: TESTO-13C3 112.1057 Mass(es): 282.100/112.100 Da  
Comment: Annotation:  
Sample Index: 28  
Sample Type: Unknown  
Concentration: N/A  
Calculated Count: 9.94  
Acq. Date: 5/3/2023  
Acq. Time: 5:58:19 AM  
Modified: Yes  
Proc. Algorithm: Specific Parameters - HQ III  
Noise Percentage: 95  
Base. Sub. Window: 1.00 min  
Peak-Split. Factor: 0  
Report Largest Peak: No  
Min. Peak Height: 0.00 cps  
Min. Peak Width: 0.00 sec  
Smoothing Width: 0 points  
RT Window: 39.8 sec  
Expected RT: 10.7 min  
Use Relative RT: No  
Int. Type: Manual  
Retention Time: 10.8 min  
Area: 7.07e+006 counts  
Height: 2.29e+006 cps  
Start Time: 10.7 min  
End Time: 11.0 min

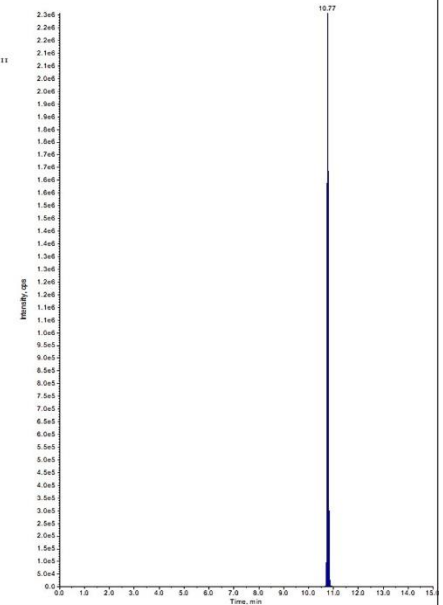

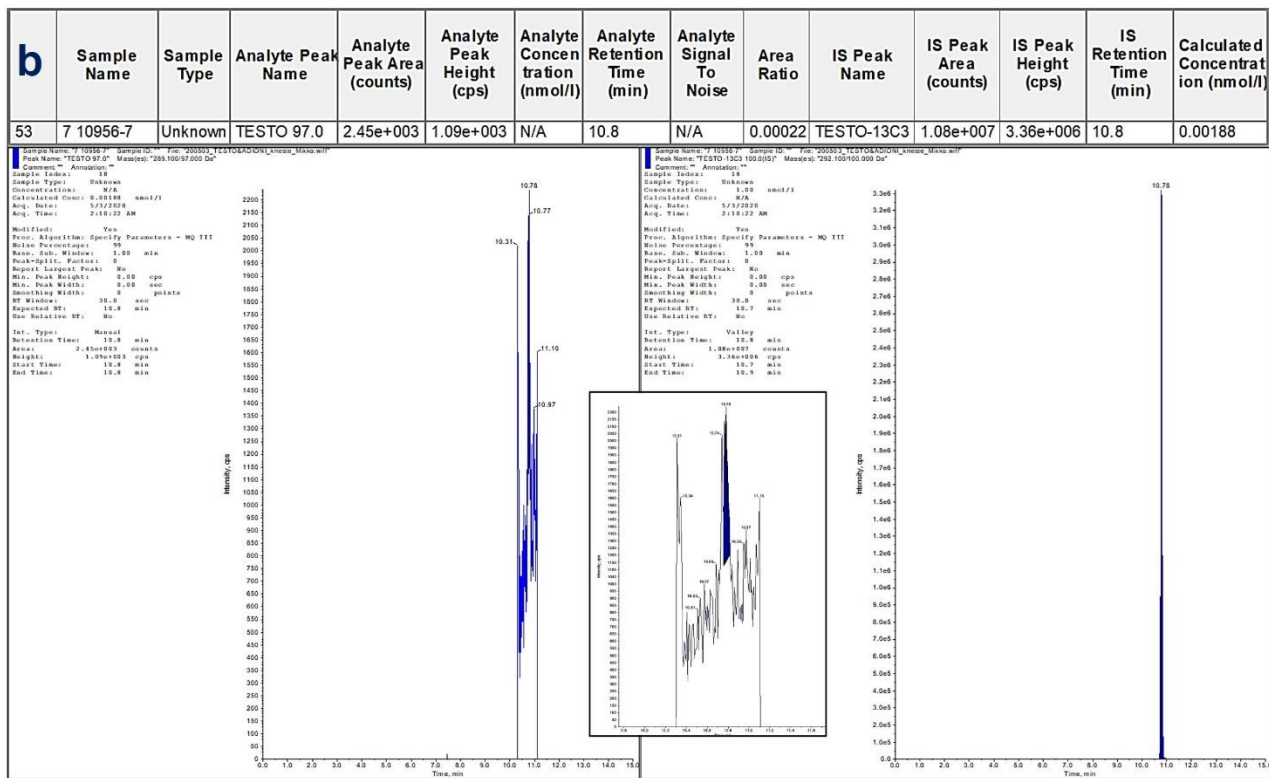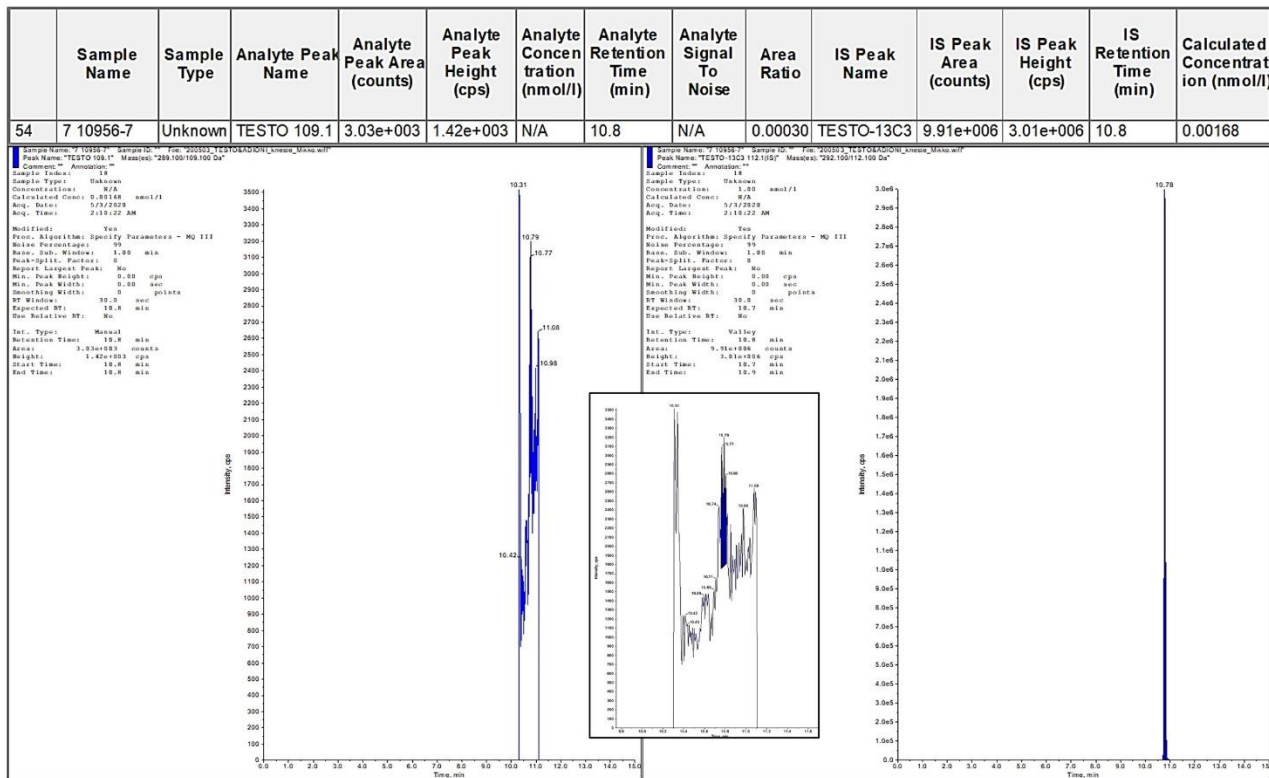

Supplement: s1 [file s1]
